# Supplementary material for: Programmable wide-range pH gradients for NMR titrations: application to antibody–drug conjugate linker group modifications
Source: Analyst. 2025 May 26;150(13):2872–9. doi: 10.1039/d5an00406c (PMC12128038; doi:10.1039/d5an00406c)
Supplement: AN-150-D5AN00406C-s002 [file AN-150-D5AN00406C-s002.xlsx]

## Sheet: Gradient prediction
				rtube/mm	2.1
				Mr/gmol-1	126.07					Use buffer components to create controlled pH gradients in AQ solution
				D/m2s-1	1.2e-09	(In water, 25degC, Leaist, D. G.; Li, Y.; Poissant, R. J. Chem. Eng. Data 1998, 43, 1048-1055.)				Predict pH gradient based on buffer, indicator composition and amount of oxalic acid that has diffused up the tube
				Thickness of acid layer/mm:	2					Populate buffer table starting from oxalate (Column P) in direction of increasing pKa in columns towards hydroxide (Column I)
				Top of image/mm:	25					Do not remove hydroxide or oxalate as the pH is calculated differently for these species
				Bottom of image/mm:	11		pKw:	14		Do not remove bicarbonate if using carbonate as buffer, as the concnetration of bicarbonate is calculated from carbonate
							Oxalic acid pKa values
				Adjust			pKa1:	1.2
				[Oxalic Acid] top/mM	2		pKa2:	4
				[Oxalic Acid] bottom/mM	110		pKa cutoff (same as pKa 2 of oxalic acid):	4
							acid cut off pH:	3
							Points are only plotted where a pH can be calculated following the procedure described in Section S2 of the Supporting Information
				Calculated
				topt/hours:	6.46962		pKa upper Leave blank if none:			12		12	10		1.2
				Mass oxalic acid to add/mg:	3.71546		Buffers (adjust)	Hydroxide (do not remove)	Carbonate	Borate	Tris	Phosphate	Bicarbonate (Do not remove)	Acetate	Oxalate (do not remove)
							Buffer concentration/M (adjust this):	0.01	0.01	0.01	0.01	0.01	0	0.01												Effective buffer concentration above pKa crit/M (Sigma Beff Equation S7)
							zH (charge of buffer in protonated form)	0	-1	0	1	-1	0	0	-1											0.0682265
							zL (charge of buffer in non-protonated form, as added)	-1	-2	-1	0	-2	-1	-1	-2		Acid allocation matrix for buffers (not shared between buffers)																														Amount of monohydrogen oxalate below acidic cutoff (T)/M:	0.0599587
	Centre of NMR image from tube bottom/mm:	20					pKaH (change if change buffers)	14	10	9	8	7	6	4.7	4		Effective buffer concentration/M Equation S6:	0.01	0.00999999	0.0099999	0.009999	0.00999001	0.00990099	0.00833662	0	Cumulative below pKa crit/M																				Different formula (Sigma Beff/2 +Oxbuff) Equation S8	Ka/M:	0.0630957
				Max I/mM;	115.734		calculation conc/M (do not adjust)	0.01	0.01	0.01	0.01	0.01	0.01	0.01	0		Buffer concentration below pKa crit/M (OxBuff or equivalent) Equation S7:								0	0				Different formula						Different formula		Buffer concentration (B in Equation S5, or [NaOH]t in S10):	0.01	0.01	0.01	0.01	0.01	0.01	0.01	0.0341133	pH from oxalate/dihydrogenoxalate (Equation S8)	Find total concentration of oxalic acid diffusant when pH just above acid cutoff (T)	pH below acidic cut off (Equation S9)
				Min I/mM:	86.1246		Cumulative effective conc buffer:	0.01	0.02	0.03	0.04	0.05	0.06	0.07	0.07			Hydroxide (do not remove)	Carbonate	Borate	Tris	Phosphate	Bicarbonate (Do not remove)	Acetate	Oxalate (do not remove)				Hydroxide (do not remove)	Carbonate	Borate	Tris	Phosphate	Bicarbonate (Do not remove)	Acetate	Oxalate (do not remove)			Hydroxide (do not remove)	Carbonate	Borate	Tris	Phosphate	Bicarbonate (Do not remove)	Acetate	Oxalate (do not remove)	Oxalate (do not remove)
	Distance from absolute tube bottom/mm	Image position/mm	[Oxalic acid]/mM (Equation S2)	pH	I (predicted)/mM assume monovalent cations		Residual acid matrix/M										Distribution ratio Equation S4 or S7	NA	0.2	0.2	0.2	0.2	0.100237	1.3613	0					Shared acid concentration/M								pH (average all buffers)
	11	-9	110	1.6616	102.39			0.11	0.105	0.1	0.095	0.09	0.085	0.08	0.0758867																							1.6616								1.6616			1.6616
	11.2	-8.8	106.476	1.68926	101.072			0.106476	0.101476	0.0964761	0.0914761	0.0864761	0.0814761	0.0764761	0.0723629																							1.68926								1.68926			1.68926
	11.4	-8.6	102.991	1.71896	99.7511			0.102991	0.0979914	0.0929914	0.0879914	0.0829914	0.0779914	0.0729914	0.0688782																							1.71896								1.71896			1.71896
	11.6	-8.4	99.5495	1.751	98.4289			0.0995495	0.0945495	0.0895495	0.0845495	0.0795495	0.0745495	0.0695495	0.0654362										0.0654362											0.0654362		1.751								1.751			1.751
	11.8	-8.2	96.1537	1.78572	97.1079			0.0961537	0.0911537	0.0861537	0.0811537	0.0761537	0.0711537	0.0661537	0.0620405										0.0620405											0.0620405		1.78572								1.78572			1.78572
	12	-8	92.8074	1.82357	95.7907			0.0928074	0.0878074	0.0828074	0.0778074	0.0728074	0.0678074	0.0628074	0.0586942										0.0586942											0.0586942		1.82357								1.82357			1.82357
	12.2	-7.8	89.5135	1.86513	94.4806			0.0895135	0.0845135	0.0795135	0.0745135	0.0695135	0.0645135	0.0595135	0.0554002										0.0554002											0.0554002		1.86513								1.86513			1.86513
	12.4	-7.6	86.2746	1.91116	93.1821			0.0862746	0.0812746	0.0762746	0.0712746	0.0662746	0.0612746	0.0562746	0.0521614										0.0521614											0.0521614		1.91116								1.91116			1.91116
	12.6	-7.4	83.0935	1.96268	91.9012			0.0830935	0.0780935	0.0730935	0.0680935	0.0630935	0.0580935	0.0530935	0.0489803										0.0489803											0.0489803		1.96268								1.96268			1.96268
	12.8	-7.2	79.9725	2.02115	90.6465			0.0799725	0.0749725	0.0699725	0.0649725	0.0599725	0.0549725	0.0499725	0.0458592										0.0458592											0.0458592		2.02115								2.02115			2.02115
	13	-7	76.9136	2.08866	89.432			0.0769136	0.0719136	0.0669136	0.0619136	0.0569136	0.0519136	0.0469136	0.0428003										0.0428003											0.0428003		2.08866								2.08866			2.08866
	13.2	-6.8	73.9188	2.16851	88.2817			0.0739188	0.0689188	0.0639188	0.0589188	0.0539188	0.0489188	0.0439188	0.0398055										0.0398055											0.0398055		2.16851								2.16851			2.16851
	13.4	-6.6	70.9898	2.26619	87.2424			0.0709898	0.0659898	0.0609898	0.0559898	0.0509898	0.0459898	0.0409898	0.0368765										0.0368765											0.0368765		2.26619								2.26619			2.26619
	13.6	-6.4	68.1281	2.39199	86.4202			0.0681281	0.0631281	0.0581281	0.0531281	0.0481281	0.0431281	0.0381281	0.0340148										0.0340148											0.0340148		2.39199								2.39199			2.39199
	13.8	-6.2	65.3349	2.56903	86.1246			0.0653349	0.0603349	0.0553349	0.0503349	0.0453349	0.0403349	0.0353349	0.0312217										0.0312217											0.0312217		2.56903								2.56903			2.56903
	14	-6	62.6115	2.87111	87.814			0.0626115	0.0576115	0.0526115	0.0476115	0.0426115	0.0376115	0.0326115	0.0284983										0.0284983											0.0284983		2.87111								2.87111			2.87111
	14.2	-5.8	59.9587	3.20398	92.4917			0.0599587	0.0549587	0.0499587	0.0449587	0.0399587	0.0349587	0.0299587	0.0258454										0.0258454											0.0258454		3.20398								3.20398	3.20398	59.9587
	14.4	-5.6	57.3772	3.36769	95.1562			0.0573772	0.0523772	0.0473772	0.0423772	0.0373772	0.0323772	0.0273772	0.0232639										0.0232639											0.0232639		3.36769								3.36769	3.36769
	14.6	-5.4	54.8675	3.50764	97.7578			0.0548675	0.0498675	0.0448675	0.0398675	0.0348675	0.0298675	0.0248675	0.0207543										0.0207543											0.0207543		3.50764								3.50764	3.50764
	14.8	-5.2	52.4301	3.63468	100.3			0.0524301	0.0474301	0.0424301	0.0374301	0.0324301	0.0274301	0.0224301	0.0183169										0.0183169											0.0183169		3.63468								3.63468	3.63468
	15	-5	50.0652	3.75531	102.788			0.0500652	0.0450652	0.0400652	0.0350652	0.0300652	0.0250652	0.0200652	0.0159519										0.0159519											0.0159519		3.75531								3.75531	3.75531
	15.2	-4.8	47.7727	3.87431	105.229			0.0477727	0.0427727	0.0377727	0.0327727	0.0277727	0.0227727	0.0177727	0.0136594										0.0136594											0.0136594		3.87431								3.87431	3.87431
	15.4	-4.6	45.5526	3.9961	107.632			0.0455526	0.0405526	0.0355526	0.0305526	0.0255526	0.0205526	0.0155526	0.0114393										0.0114393											0.0114393		3.9961								3.9961	3.9961
	15.6	-4.4	43.4046	4.12573	110.014			0.0434046	0.0384046	0.0334046	0.0284046	0.0234046	0.0184046	0.0134046	0.0092913										0.0092913											0.0092913		4.12573								4.12573	4.12573
	15.8	-4.2	41.3282	4.27046	112.403			0.0413282	0.0363282	0.0313282	0.0263282	0.0213282	0.0163282	0.0113282	0.00721499										0.00721499											0.00721499		4.27046								4.27046	4.27046
	16	-4	39.3231	4.44309	114.847			0.0393231	0.0343231	0.0293231	0.0243231	0.0193231	0.0143231	0.0093231	0.00520985										0.00520985											0.00520985		4.44309								4.44309	4.44309
	16.2	-3.8	37.3885	#N/A				0.0373885	0.0323885	0.0273885	0.0223885	0.0173885	0.0123885	0.00738849	0.00327523										0.00327523											0.00327523		4.67282								4.67282	4.67282
	16.4	-3.6	35.5236	#N/A				0.0355236	0.0305236	0.0255236	0.0205236	0.0155236	0.0105236	0.00552362	0.00141036										0.00141036											0.00141036		5.06423								5.06423	5.06423
	16.6	-3.4	33.7276	4.95366	115.734			0.0337276	0.0287276	0.0237276	0.0187276	0.0137276	0.00872762	0.00372762	-0.000385638									0.00372762											0.00157863	0.00214899		4.95366							5.03592	4.8714	4.8714
	16.8	-3.2	31.9995	#N/A				0.0319995	0.0269995	0.0219995	0.0169995	0.0119995	0.00699952	0.00199952	-0.00211374									0.00199952											0.000846788	0.00115273		5.27292							5.39061	5.15524	5.15524
	17	-3	30.3382	#N/A				0.0303382	0.0253382	0.0203382	0.0153382	0.0103382	0.00533824	0.000338241	-0.00377502									0.000338241											0.000143244	0.000194997		6.08482							6.23027	5.93938	5.93938
	17.2	-2.8	28.7426	5.75378	112.114			0.0287426	0.0237426	0.0187426	0.0137426	0.00874263	0.00374263	-0.00125737	-0.00537062								0.00374263											0.00340166	0.000340974			5.75378						5.67198	5.83557
	17.4	-2.6	27.2115	6.12468	110.645			0.0272115	0.0222115	0.0172115	0.0122115	0.00721147	0.00221147	-0.00278853	-0.00690179								0.00221147											0.00200999	0.000201476			6.12468						6.17248	6.07688
	17.6	-2.4	25.7434	#N/A				0.0257434	0.0207434	0.0157434	0.0107434	0.00574344	0.000743441	-0.00425656	-0.00836982								0.000743441											0.00067571	6.77314e-05			6.68421						6.80615	6.56226
	17.8	-2.2	24.3372	6.67786	108.189			0.0243372	0.0193372	0.0143372	0.00933719	0.00433719	-0.000662809	-0.00566281	-0.00977607							0.00433719											0.00361433	0.000722865				6.67786					6.58363	6.7721
	18	-2	22.9913	6.97908	107.866			0.0229913	0.0179913	0.0129913	0.0079913	0.0029913	-0.0020087	-0.0070087	-0.011122							0.0029913											0.00249275	0.00049855				6.97908					7.00252	6.95564
	18.2	-1.8	21.7043	7.31083	107.737			0.0217043	0.0167043	0.0117043	0.0067043	0.0017043	-0.0032957	-0.0082957	-0.012409							0.0017043											0.00142025	0.00028405				7.31083					7.40149	7.22017
	18.4	-1.6	20.4747	#N/A				0.0204747	0.0154747	0.0104747	0.00547469	0.000474689	-0.00452531	-0.00952531	-0.0136386							0.000474689											0.000395574	7.91148e-05				7.92987					8.06595	7.79379
	18.6	-1.4	19.3009	7.6865	104.7			0.0193009	0.0143009	0.00930092	0.00430092	-0.000699079	-0.00569908	-0.0106991	-0.0148123						0.00430092											0.0035841	0.00071682					7.6865				7.59665	7.77636
	18.8	-1.2	18.1814	7.93661	103.01			0.0181814	0.0131814	0.00818143	0.00318143	-0.00181857	-0.00681857	-0.0118186	-0.0159318						0.00318143											0.00265119	0.000530238					7.93661				7.94741	7.92581
	19	-1	17.1146	8.19217	101.18			0.0171146	0.0121146	0.00711462	0.00211462	-0.00288538	-0.00788538	-0.0128854	-0.0169986						0.00211462											0.00176218	0.000352436					8.19217				8.2642	8.12015
	19.2	-0.8	16.0989	#N/A				0.0160989	0.0110989	0.00609888	0.00109888	-0.00390112	-0.00890112	-0.0139011	-0.0180144						0.00109888											0.00091573	0.000183146					8.53466				8.64935	8.41997
	19.4	-0.6	15.1326	#N/A				0.0151326	0.0101326	0.00513259	0.000132586	-0.00486741	-0.00986741	-0.0148674	-0.0189807						0.000132586											0.000110488	2.20977e-05					9.49932				9.64595	9.3527
	19.6	-0.4	14.2141	8.70691	96.3756			0.0142141	0.00921412	0.00421412	-0.00078588	-0.00578588	-0.0107859	-0.0157859	-0.0198991					0.00421412											0.00351177	0.000702353						8.70691			8.62715	8.78668
	19.8	-0.2	13.3418	8.90122	95.3824			0.0133418	0.00834185	0.00334185	-0.00165815	-0.00665815	-0.0116582	-0.0166582	-0.0207714					0.00334185											0.00278487	0.000556975						8.90122			8.90059	8.90184
	20	0	12.5141	9.09032	94.6922			0.0125141	0.00751415	0.00251415	-0.00248585	-0.00748585	-0.0124859	-0.0174859	-0.0215991					0.00251415											0.00209512	0.000419025						9.09032			9.14192	9.03872
	20.2	0.2	11.7294	9.30302	94.4794			0.0117294	0.0067294	0.0017294	-0.0032706	-0.0082706	-0.0132706	-0.0182706	-0.0223839					0.0017294											0.00144117	0.000288233						9.30302			9.39259	9.21344
	20.4	0.4	10.986	#N/A				0.010986	0.005986	0.000985998	-0.004014	-0.009014	-0.014014	-0.019014	-0.0231273					0.000985998											0.000821665	0.000164333						9.58752			9.70631	9.46873
	20.6	0.6	10.2824	#N/A				0.0102824	0.00528235	0.000282352	-0.00471765	-0.00971765	-0.0147176	-0.0197176	-0.0238309					0.000282352											0.000235293	4.70587e-05						10.1643			10.3064	10.0222
	20.8	0.8	9.61689	9.60835	92.6791			0.00961689	0.00461689	-0.000383111	-0.00538311	-0.0103831	-0.0153831	-0.0203831	-0.0244964				0.00461689											0.00384741	0.000769482							9.60835		9.47651	9.7402
	21	1	8.98806	9.75863	92.79			0.00898806	0.00398806	-0.00101194	-0.00601194	-0.0110119	-0.0160119	-0.0210119	-0.0251252				0.00398806											0.00332338	0.000664677							9.75863		9.70285	9.81441
	21.2	1.2	8.39434	9.88969	92.8534			0.00839434	0.00339434	-0.00160566	-0.00660566	-0.0116057	-0.0166057	-0.0216057	-0.0257189				0.00339434											0.00282862	0.000565723							9.88969		9.88516	9.89422
	21.4	1.4	7.83423	10.0148	92.9408			0.00783423	0.00283423	-0.00216577	-0.00716577	-0.0121658	-0.0171658	-0.0221658	-0.026279				0.00283423											0.00236186	0.000472372							10.0148		10.048	9.98159
	21.6	1.6	7.30627	10.142	93.086			0.00730627	0.00230627	-0.00269373	-0.00769373	-0.0126937	-0.0176937	-0.0226937	-0.026807				0.00230627											0.00192189	0.000384378							10.142		10.2046	10.0795
	21.8	1.8	6.80901	10.2788	93.309			0.00680901	0.00180901	-0.00319099	-0.00819099	-0.013191	-0.018191	-0.023191	-0.0273043				0.00180901											0.00150751	0.000301501							10.2788		10.3649	10.1927
	22	2	6.34105	10.4353	93.627			0.00634105	0.00134105	-0.00365895	-0.00865895	-0.0136589	-0.0186589	-0.0236589	-0.0277722				0.00134105											0.00111754	0.000223508							10.4353		10.5408	10.3298
	22.2	2.2	5.90103	#N/A				0.00590103	0.000901031	-0.00409897	-0.00909897	-0.014099	-0.019099	-0.024099	-0.0282122				0.000901031											0.000750859	0.000150172							10.6309		10.7527	10.5091
	22.4	2.4	5.48762	#N/A				0.00548762	0.000487618	-0.00451238	-0.00951238	-0.0145124	-0.0195124	-0.0245124	-0.0286256				0.000487618											0.000406348	8.12696e-05							10.9176		11.0533	10.7819
	22.6	2.6	5.09952	#N/A				0.00509952	9.95164e-05	-0.00490048	-0.00990048	-0.0149005	-0.0199005	-0.0249005	-0.0290137				9.95164e-05											8.29304e-05	1.65861e-05							11.6254		11.773	11.4778
	22.8	2.8	4.73547	#N/A				0.00473547	-0.000264527	-0.00526453	-0.0102645	-0.0152645	-0.0202645	-0.0252645	-0.0293778			0.00473547											0.00473547									9.58687	9.58687
	23	3	4.39427	11.0833	93.2125			0.00439427	-0.000605728	-0.00560573	-0.0106057	-0.0156057	-0.0206057	-0.0256057	-0.029719			0.00439427											0.00439427									11.0833	11.0833
	23.2	3.2	4.07474	11.2673	93.2807			0.00407474	-0.000925261	-0.00592526	-0.0109253	-0.0159253	-0.0209253	-0.0259253	-0.0300385			0.00407474											0.00407474									11.2673	11.2673
	23.4	3.4	3.77574	11.3889	93.1683			0.00377574	-0.00122426	-0.00622426	-0.0112243	-0.0162243	-0.0212243	-0.0262243	-0.0303375			0.00377574											0.00377574									11.3889	11.3889
	23.6	3.6	3.49617	11.4782	92.9981			0.00349617	-0.00150383	-0.00650383	-0.0115038	-0.0165038	-0.0215038	-0.0265038	-0.0306171			0.00349617											0.00349617									11.4782	11.4782
	23.8	3.8	3.23499	11.5478	92.8086			0.00323499	-0.00176501	-0.00676501	-0.011765	-0.016765	-0.021765	-0.026765	-0.0308783			0.00323499											0.00323499									11.5478	11.5478
	24	4	2.99118	11.604	92.6154			0.00299118	-0.00200882	-0.00700882	-0.0120088	-0.0170088	-0.0220088	-0.0270088	-0.0311221			0.00299118											0.00299118									11.604	11.604
	24.2	4.2	2.76377	11.6505	92.4253			0.00276377	-0.00223623	-0.00723623	-0.0122362	-0.0172362	-0.0222362	-0.0272362	-0.0313495			0.00276377											0.00276377									11.6505	11.6505
	24.4	4.4	2.55182	11.6899	92.2421			0.00255182	-0.00244818	-0.00744818	-0.0124482	-0.0174482	-0.0224482	-0.0274482	-0.0315614			0.00255182											0.00255182									11.6899	11.6899
	24.6	4.6	2.35444	11.7235	92.0674			0.00235444	-0.00264556	-0.00764556	-0.0126456	-0.0176456	-0.0226456	-0.0276456	-0.0317588			0.00235444											0.00235444									11.7235	11.7235
	24.8	4.8	2.17077	11.7527	91.9021			0.00217077	-0.00282923	-0.00782923	-0.0128292	-0.0178292	-0.0228292	-0.0278292	-0.0319425			0.00217077											0.00217077									11.7527	11.7527
	25	5	2	11.7782	91.7464			0.002	-0.003	-0.008	-0.013	-0.018	-0.023	-0.028	-0.0321133			0.002											0.002									11.7782	11.7782
	25.2	5.2	1.84134	11.8005	91.6003			0.00184134	-0.00315866	-0.00815866	-0.0131587	-0.0181587	-0.0231587	-0.0281587	-0.0322719			0.00184134											0.00184134									11.8005	11.8005
	25.4	5.4	1.69406	11.8203	91.4636			0.00169406	-0.00330594	-0.00830594	-0.0133059	-0.0183059	-0.0233059	-0.0283059	-0.0324192			0.00169406											0.00169406									11.8203	11.8203
	25.6	5.6	1.55744	11.8379	91.336			0.00155744	-0.00344256	-0.00844256	-0.0134426	-0.0184426	-0.0234426	-0.0284426	-0.0325558			0.00155744											0.00155744									11.8379	11.8379
	25.8	5.8	1.43082	11.8536	91.2171			0.00143082	-0.00356918	-0.00856918	-0.0135692	-0.0185692	-0.0235692	-0.0285692	-0.0326824			0.00143082											0.00143082									11.8536	11.8536
	26	6	1.31355	11.8676	91.1065			0.00131355	-0.00368645	-0.00868645	-0.0136864	-0.0186864	-0.0236864	-0.0286864	-0.0327997			0.00131355											0.00131355									11.8676	11.8676
	26.2	6.2	1.20503	11.8802	91.0039			0.00120503	-0.00379497	-0.00879497	-0.013795	-0.018795	-0.023795	-0.028795	-0.0329082			0.00120503											0.00120503									11.8802	11.8802
	26.4	6.4	1.10469	11.8916	90.9086			0.00110469	-0.00389531	-0.00889531	-0.0138953	-0.0188953	-0.0238953	-0.0288953	-0.0330086			0.00110469											0.00110469									11.8916	11.8916
	26.6	6.6	1.01197	11.9018	90.8204			0.00101197	-0.00398803	-0.00898803	-0.013988	-0.018988	-0.023988	-0.028988	-0.0331013			0.00101197											0.00101197									11.9018	11.9018
	26.8	6.8	0.926376	11.911	90.7388			0.000926376	-0.00407362	-0.00907362	-0.0140736	-0.0190736	-0.0240736	-0.0290736	-0.0331869			0.000926376											0.000926376									11.911	11.911
	27	7	0.847413	11.9193	90.6634			0.000847413	-0.00415259	-0.00915259	-0.0141526	-0.0191526	-0.0241526	-0.0291526	-0.0332658			0.000847413											0.000847413									11.9193	11.9193
	27.2	7.2	0.774627	11.9269	90.5937			0.000774627	-0.00422537	-0.00922537	-0.0142254	-0.0192254	-0.0242254	-0.0292254	-0.0333386			0.000774627											0.000774627									11.9269	11.9269
	27.4	7.4	0.707585	11.9337	90.5295			0.000707585	-0.00429241	-0.00929241	-0.0142924	-0.0192924	-0.0242924	-0.0292924	-0.0334057			0.000707585											0.000707585									11.9337	11.9337
	27.6	7.6	0.645884	11.9399	90.4703			0.000645884	-0.00435412	-0.00935412	-0.0143541	-0.0193541	-0.0243541	-0.0293541	-0.0334674			0.000645884											0.000645884									11.9399	11.9399
	27.8	7.8	0.589141	11.9456	90.4157			0.000589141	-0.00441086	-0.00941086	-0.0144109	-0.0194109	-0.0244109	-0.0294109	-0.0335241			0.000589141											0.000589141									11.9456	11.9456
	28	8	0.536999	11.9507	90.3656			0.000536999	-0.004463	-0.009463	-0.014463	-0.019463	-0.024463	-0.029463	-0.0335763			0.000536999											0.000536999									11.9507	11.9507
	28.2	8.2	0.489122	11.9553	90.3195			0.000489122	-0.00451088	-0.00951088	-0.0145109	-0.0195109	-0.0245109	-0.0295109	-0.0336241			0.000489122											0.000489122									11.9553	11.9553
	28.4	8.4	0.445194	11.9595	90.2772			0.000445194	-0.00455481	-0.00955481	-0.0145548	-0.0195548	-0.0245548	-0.0295548	-0.0336681			0.000445194											0.000445194									11.9595	11.9595
	28.6	8.6	0.404922	11.9633	90.2384			0.000404922	-0.00459508	-0.00959508	-0.0145951	-0.0195951	-0.0245951	-0.0295951	-0.0337083			0.000404922											0.000404922									11.9633	11.9633
	28.8	8.8	0.368029	11.9668	90.2028			0.000368029	-0.00463197	-0.00963197	-0.014632	-0.019632	-0.024632	-0.029632	-0.0337452			0.000368029											0.000368029									11.9668	11.9668
	29	9	0.334258	11.97	90.1702			0.000334258	-0.00466574	-0.00966574	-0.0146657	-0.0196657	-0.0246657	-0.0296657	-0.033779			0.000334258											0.000334258									11.97	11.97
	29.2	9.2	0.303369	11.9728	90.1404			0.000303369	-0.00469663	-0.00969663	-0.0146966	-0.0196966	-0.0246966	-0.0296966	-0.0338099			0.000303369											0.000303369									11.9728	11.9728
	29.4	9.4	0.275138	11.9754	90.1131			0.000275138	-0.00472486	-0.00972486	-0.0147249	-0.0197249	-0.0247249	-0.0297249	-0.0338381			0.000275138											0.000275138									11.9754	11.9754
	29.6	9.6	0.249355	11.9778	90.0882			0.000249355	-0.00475064	-0.00975064	-0.0147506	-0.0197506	-0.0247506	-0.0297506	-0.0338639			0.000249355											0.000249355									11.9778	11.9778
	29.8	9.8	0.225827	11.9799	90.0655			0.000225827	-0.00477417	-0.00977417	-0.0147742	-0.0197742	-0.0247742	-0.0297742	-0.0338874			0.000225827											0.000225827									11.9799	11.9799
	30	10	0.204372	11.9819	90.0448			0.000204372	-0.00479563	-0.00979563	-0.0147956	-0.0197956	-0.0247956	-0.0297956	-0.0339089			0.000204372											0.000204372									11.9819	11.9819
	30.2	10.2	0.184824	11.9836	90.0258			0.000184824	-0.00481518	-0.00981518	-0.0148152	-0.0198152	-0.0248152	-0.0298152	-0.0339284			0.000184824											0.000184824									11.9836	11.9836
	30.4	10.4	0.167025	11.9852	90.0086			0.000167025	-0.00483297	-0.00983297	-0.014833	-0.019833	-0.024833	-0.029833	-0.0339462			0.000167025											0.000167025									11.9852	11.9852
	30.6	10.6	0.150833	11.9867	89.993			0.000150833	-0.00484917	-0.00984917	-0.0148492	-0.0198492	-0.0248492	-0.0298492	-0.0339624			0.000150833											0.000150833									11.9867	11.9867
	30.8	10.8	0.136113	11.988	89.9787			0.000136113	-0.00486389	-0.00986389	-0.0148639	-0.0198639	-0.0248639	-0.0298639	-0.0339771			0.000136113											0.000136113									11.988	11.988
	31	11	0.122742	11.9892	89.9658			0.000122742	-0.00487726	-0.00987726	-0.0148773	-0.0198773	-0.0248773	-0.0298773	-0.0339905			0.000122742											0.000122742									11.9892	11.9892

## Sheet: pH
DSS reference shift/ppm:	0
Cutoff chemical shift for pH measurement/ppm:	0.005
Uncertainty in chemical shift/ppm:	0.005						pKa,0:	1.35	2.38	3.75	4.76	6.75	7.99	9.78	10.66
							dH/ppm:	6.3118	1.5106	8.2669	2.083	2.7074	1.2819	3.5494	2.5942
							dL/ppm:	6.048	1.2819	8.4414	1.906	2.4563	1.0711	3.1754	2.2901
							dH-dL /ppm	0.2638	0.2287	-0.1745	0.177	0.2511	0.2108	0.374	0.3041
							Dz2	-1	-1	-1	-1	1	-3	-1	1
Max ionic strength from buffers/mM:	115.734
Min ionic strength from buffers/mM:	86.1246			These rows lie on the edges of the NMR-active region of the sample and are excluded from analysis
Ionic strength from indicators and analyte/mM:	20
No rows:	128
zrange/mm	26
Centre of image from tube base/mm:	20						Raw chemical shift data
							REFERENCE	INDICATORS									ANALYTE 1	ANALYTE 2	ANALYTE 3			Referenced chemical shifts																Filter chemical shifts										Calculate pH of each indicator
Row on CSI image	Height from tube base/mm	I/M	pH	Uncertainty in pH			DSS	DCA	MPAH	Formate	Acetate	2,6-lutidine	MPA	Glycine	Methylamine		His imid up	His alpha	His beta dnfield			Correction based on DSS	DCA	MPAH	Formate	Acetate	2,6-lutidine	MPA	Glycine	Methylamine		His imid up	His alpha	His beta dnfield				DCA	MPAH	Formate	Acetate	2,6-lutidine	MPA	Glycine	Methylamine			DCA	MPAH
1	7.10156	0.120929	2.07566	0.100842			0.007424	6.0884	1.0812		1.91723		1.0812									-0.007424	6.08097	1.07378		1.90981		1.07378										6.08097										2.07566
2	7.30469	0.120929	1.2744	0.0414348			-0.15658	6.01666	1.08121		1.9151		1.08121									0.15658	6.17324	1.23779		2.07168		1.23779										6.17324			2.07168		1.23779					1.2744
3	7.50781	0.120929	1.38988	0.0428811			-0.01669	6.13928	1.24703		2.08533		1.24703									0.01669	6.15597	1.26372		2.10202		1.26372										6.15597					1.26372					1.38988
4	7.71094	0.120929	1.79175	0.0644911			-0.017452	5.97058	1.43514		2.07748		1.43514									0.017452	5.98803	1.4526		2.09493		1.4526											1.4526										1.79175
5	7.91406	0.120929	7.44239	0.0597789			0.213597	5.99658	1.41269		2.06552		1.41269									-0.213597	5.78298	1.19909		1.85192		1.19909															1.19909
6	8.11719	0.120929	1.89977	0.0571161			-0.017479	5.94358	1.42371		2.06504		1.42371									0.017479	5.96105	1.44119		2.08252		1.44119											1.44119										1.89977
7	8.32031	0.120929	1.96699	0.069908			-0.013704	6.07054	1.42427		2.06806		1.42427									0.013704	6.08424	1.43797		2.08176		1.43797										6.08424	1.43797									2.02837	1.92828
8	8.52344	0.120929	1.93675	0.0635842			-0.012046	6.08138	1.42286		2.07042		1.42286									0.012046	6.09342	1.43491		2.08246		1.43491										6.09342	1.43491									1.91241	1.95482
9	8.72656	0.120929	1.96893	0.0671365			-0.010883	6.07617	1.42403		2.0709		1.42403									0.010883	6.08705	1.43492		2.08178		1.43492										6.08705	1.43492									1.99052	1.95475
10	8.92969	0.120929	1.92493	0.0628735			-0.0114	6.08376	1.4241		2.072		1.4241									0.0114	6.09516	1.4355		2.0834		1.4355										6.09516	1.4355									1.89266	1.94972
11	9.13281	0.120929	1.92551	0.0630477			-0.009918	6.08498	1.42575		2.07442		1.42575									0.009918	6.09489	1.43566		2.08434		1.43566										6.09489	1.43566									1.89567	1.94835
12	9.33594	0.120929	1.96315	0.0669875			-0.008803	6.07879	1.42672		2.07511		1.42672									0.008803	6.0876	1.43552		2.08391		1.43552										6.0876	1.43552									1.98348	1.94958
13	9.53906	0.120929	2.02714	0.0703146			-0.002725	6.07745	1.42752		2.07638		1.42752									0.002725	6.08017	1.43024		2.07911		1.43024										6.08017	1.43024									2.08783	1.99425
14	9.74219	0.120929	1.96425	0.0657757			-0.006389	6.08253	1.42761		2.07759		1.42761									0.006389	6.08892	1.434		2.08398		1.434										6.08892	1.434									1.96667	1.96261
15	9.94531	0.120929	1.96427	0.0657254			-0.005941	6.08303	1.428		2.07865		1.428									0.005941	6.08897	1.43394		2.08459		1.43394										6.08897	1.43394									1.96595	1.96314
16	10.1484	0.120929	1.98029	0.06709			-0.004893	6.0815	1.42846		2.07998		1.42846									0.004893	6.08639	1.43335		2.08487		1.43335										6.08639	1.43335									1.99927	1.96812
17	10.3516	0.120929	2.00368	0.0685885			-0.002772	6.08055	1.42901		2.0814		1.42901									0.002772	6.08333	1.43178		2.08418		1.43178										6.08333	1.43178									2.04126	1.98142
18	10.5547	0.120929	1.98436	0.0656856			-0.002088	6.08568	1.4291		2.08196		1.4291									0.002088	6.08777	1.43118		2.08405		1.43118										6.08777	1.43118									1.98124	1.9864
19	10.7578	0.120929	2.02257	0.0686166			-0.000731	6.08149	1.42847		2.08195		1.42847									0.000731	6.08222	1.4292		2.08269		1.4292										6.08222	1.4292									2.0571	2.00295
20	10.9609	0.120929	2.03542	0.0691395			2.8e-05	6.08099	1.42796	8.23419	2.08255	2.70321	1.42796	3.80061			7.40206	4.18115	3.38687			-2.8e-05	6.08097	1.42793	8.23416	2.08252	2.70318	1.42793	3.80058			7.40203	4.18112	3.38684				6.08097	1.42793									2.07574	2.01338
21	11.1641	0.120929	2.03501	0.0693132			0.000457	6.08126	1.42862	8.23781	2.08399	2.70511	1.42862	3.80144			7.40413	4.18237	3.38877			-0.000457	6.0808	1.42817	8.23735	2.08354	2.70466	1.42817	3.80098			7.40367	4.18192	3.38832				6.0808	1.42817									2.07824	2.01146
22	11.3672	0.120929	2.05447	0.0697011			0.003317	6.08271	1.42911	8.23507	2.08528	2.70568	1.42911	3.79905			7.40369	4.17778	3.38907			-0.003317	6.07939	1.42579	8.23175	2.08196	2.70236	1.42579	3.79573			7.40038	4.17447	3.38575				6.07939	1.42579			2.70236						2.09992	2.03092
23	11.5703	0.120929	2.06042	0.069521			0.003591	6.08289	1.42834	8.23561	2.08574	2.70625	1.42834	3.79862			7.40339	4.17744	3.38849			-0.003591	6.0793	1.42475	8.23202	2.08215	2.70266	1.42475	3.79503			7.3998	4.17385	3.3849				6.0793	1.42475									2.10138	2.03935
24	11.7734	0.120929	2.04974	0.0677152			0.003396	6.08523	1.42775	8.23774	2.0869	2.70756	1.42775	3.79849			7.40506	4.17984	3.38836			-0.003396	6.08183	1.42435	8.23435	2.08351	2.70417	1.42435	3.79509			7.40166	4.17644	3.38497				6.08183	1.42435									2.06281	2.04257
25	11.9766	0.120929	2.07016	0.0681681			0.005443	6.08581	1.42732	8.23844	2.08758	2.70776	1.42732	3.7961			7.40476	4.17212	3.38785			-0.005443	6.08037	1.42188	8.23299	2.08214	2.70232	1.42188	3.79066			7.39932	4.16668	3.38241				6.08037	1.42188			2.70232						2.08484	2.06248
26	12.1797	0.120929	2.08428	0.0685411			0.005808	6.08514	1.426	8.23918	2.08762	2.70818	1.426	3.79452			7.40445	4.17196	3.3878			-0.005808	6.07933	1.42019	8.23337	2.08181	2.70237	1.42019	3.78871			7.39864	4.16615	3.38199				6.07933	1.42019			2.70237						2.10089	2.0759
27	12.3828	0.120929	2.09703	0.0699889			0.005439	6.08262	1.42528	8.24026	2.08859	2.70917	1.42528	3.79377			7.40554	4.17364	3.38752			-0.005439	6.07718	1.41984	8.23482	2.08315	2.70373	1.41984	3.78833			7.4001	4.1682	3.38208				6.07718	1.41984									2.13571	2.07869
28	12.5859	0.120929	2.09223	0.0690617			0.004437	6.08285	1.42402	8.24346	2.08865	2.7094	1.42402	3.7926			7.40728	4.16937	3.38735			-0.004437	6.07841	1.41958	8.23902	2.08421	2.70496	1.41958	3.78816			7.40285	4.16493	3.38291				6.07841	1.41958									2.11554	2.08078
29	12.7891	0.120929	2.11401	0.0705921			0.005797	6.08167	1.42369	8.24264	2.08918	2.70982	1.42369	3.79092			7.40633	4.1701	3.38784			-0.005797	6.07587	1.4179	8.23684	2.08339	2.70402	1.4179	3.78513			7.40053	4.1643	3.38205				6.07587	1.4179									2.15811	2.09407
30	12.9922	0.120929	2.12004	0.0695408			0.006339	6.08317	1.4222	8.2428	2.08958	2.71004	1.4222	3.78952			7.40538	4.16921	3.38687			-0.006339	6.07683	1.41586	8.23646	2.08324	2.7037	1.41586	3.78319			7.39904	4.16287	3.38054				6.07683	1.41586									2.14164	2.11004
31	13.1953	0.120929	2.12182	0.0688861			0.006234	6.08376	1.42108	8.24329	2.09036	2.71104	1.42108	3.78778			7.40577	4.16261	3.38547			-0.006234	6.07753	1.41484	8.23705	2.08413	2.7048	1.41484	3.78154			7.39954	4.15637	3.37924				6.07753	1.41484									2.12994	2.11799
32	13.3984	0.120929	2.14011	0.0700982			0.005954	6.08151	1.4193	8.24488	2.09075	2.7115	1.4193	3.7856			7.40614	4.15795	3.38557			-0.005954	6.07555	1.41334	8.23893	2.08479	2.70555	1.41334	3.77965			7.40019	4.152	3.37961				6.07555	1.41334									2.16372	2.12969
33	13.6016	0.120929	2.16913	0.0712192			0.007833	6.08133	1.41777	8.24494	2.09099	2.71177	1.41777	3.78222			7.40489	4.15655	3.38551			-0.007833	6.0735	1.40993	8.23711	2.08315	2.70393	1.40993	3.77439			7.39706	4.14872	3.37767				6.0735	1.40993									2.2011	2.15606
34	13.8047	0.120929	2.17373	0.0705689			0.007327	6.08146	1.4158	8.24653	2.09117	2.71194	1.4158	3.78055			7.40603	4.15149	3.38513			-0.007327	6.07414	1.40848	8.2392	2.08385	2.70461	1.40848	3.77323			7.3987	4.14416	3.3778				6.07414	1.40848									2.18921	2.16728
35	14.0078	0.120929	2.1936	0.0720608			0.007909	6.07994	1.41476	8.24466	2.09197	2.71258	1.41476	3.77716			7.40407	4.15049	3.38502			-0.007909	6.07203	1.40685	8.23675	2.08406	2.70467	1.40685	3.76925			7.39616	4.14258	3.37711				6.07203	1.40685									2.2295	2.17977
36	14.2109	0.120929	2.22174	0.0734093			0.008897	6.07899	1.41248	8.24477	2.0919	2.71296	1.41248	3.77363			7.40393	4.15115	3.38388			-0.008897	6.07009	1.40358	8.23587	2.083	2.70406	1.40358	3.76474			7.39504	4.14226	3.37498				6.07009	1.40358									2.26954	2.20475
37	14.4141	0.120929	2.23871	0.0741543			0.009114	6.0782	1.41059	8.24583	2.09219	2.71337	1.41059	3.77121			7.40473	4.14308	3.3828			-0.009114	6.06909	1.40148	8.23672	2.08307	2.70426	1.40148	3.7621			7.39561	4.13396	3.37369				6.06909	1.40148									2.29149	2.22076
38	14.6172	0.120929	2.26813	0.0754866			0.010469	6.07794	1.40824	8.24567	2.09245	2.71361	1.40824	3.76739			7.40294	4.14108	3.38221			-0.010469	6.06747	1.39777	8.2352	2.08198	2.70315	1.39777	3.75692			7.39247	4.13061	3.37174				6.06747	1.39777									2.32899	2.24892
39	14.8203	0.120929	2.26389	0.0735479			0.008897	6.07855	1.4054	8.24926	2.09227	2.71403	1.4054	3.76374			7.40535	4.13946	3.3824			-0.008897	6.06965	1.3965	8.24036	2.08337	2.70514	1.3965	3.75484			7.39645	4.13056	3.3735				6.06965	1.3965									2.27917	2.25858
40	15.0234	0.120929	2.27049	0.0731561			0.008486	6.0786	1.40335	8.25086	2.09306	2.71497	1.40335	3.76116			7.40592	4.13673	3.38204			-0.008486	6.07012	1.39487	8.24238	2.08457	2.70648	1.39487	3.75268			7.39743	4.12824	3.37356				6.07012	1.39487									2.269	2.27101
41	15.2266	0.120929	2.30913	0.0753521			0.010038	6.07783	1.40041	8.24892	2.09276	2.71444	1.40041	3.75507			7.40276	4.12901	3.37979			-0.010038	6.06779	1.39038	8.23888	2.08272	2.70441	1.39038	3.74503			7.39273	4.11897	3.36976				6.06779	1.39038									2.32151	2.30515
42	15.4297	0.120929	2.33374	0.0760738			0.010916	6.07822	1.39752	8.25067	2.09293	2.71501	1.39752	3.75123			7.40316	4.12749	3.3791			-0.010916	6.06731	1.3866	8.23976	2.08202	2.70409	1.3866	3.74031			7.39224	4.11657	3.36818				6.06731	1.3866									2.33303	2.33397
43	15.6328	0.120929	2.36763	0.0785903			0.011991	6.07713	1.39498	8.24944	2.09391	2.71552	1.39498	3.74617			7.4012	4.12249	3.37745			-0.011991	6.06514	1.38299	8.23745	2.08192	2.70353	1.38299	3.73418			7.3892	4.1105	3.36546				6.06514	1.38299									2.38864	2.36166
44	15.8359	0.120929	2.38472	0.0791251			0.010454	6.07547	1.39073	8.25084	2.09304	2.71471	1.39073	3.73939			7.40033	4.11831	3.37449			-0.010454	6.06501	1.38028	8.24039	2.08259	2.70426	1.38028	3.72894			7.38987	4.10785	3.36404				6.06501	1.38028									2.39204	2.38264
45	16.0391	0.120929	2.40536	0.0793794			0.010832	6.0763	1.38722	8.25377	2.09354	2.71581	1.38722	3.735			7.40187	4.11646	3.3753			-0.010832	6.06547	1.37639	8.24294	2.08271	2.70498	1.37639	3.72417			7.39104	4.10563	3.36447				6.06547	1.37639									2.37978	2.41289
46	16.2422	0.120929	2.45124	0.0845184			0.010461	6.07205	1.38331	8.25501	2.09329	2.71523	1.38331	3.72672			7.40022	4.10999	3.37382			-0.010461	6.06159	1.37285	8.24455	2.08283	2.70477	1.37285	3.71626			7.38976	4.09953	3.36336				6.06159	1.37285									2.49552	2.44082
47	16.4453	0.120929	2.47491	0.0853454			0.010433	6.07232	1.37935	8.25558	2.09339	2.71539	1.37935	3.72178			7.39971	4.10461	3.37196			-0.010433	6.06188	1.36891	8.24515	2.08296	2.70496	1.36891	3.71134			7.38928	4.09418	3.36153				6.06188	1.36891									2.48581	2.47226
48	16.6484	0.120929	2.5086	0.0873933			0.011467	6.07315	1.37544	8.25813	2.09374	2.71607	1.37544	3.71659			7.4006	4.10281	3.37121			-0.011467	6.06168	1.36397	8.24666	2.08227	2.7046	1.36397	3.70512			7.38913	4.09135	3.35974				6.06168	1.36397									2.49263	2.51254
49	16.8516	0.120929	2.56386	0.0939662			0.011568	6.07019	1.37046	8.25756	2.09311	2.71551	1.37046	3.70811			7.39694	4.09503	3.3692			-0.011568	6.05862	1.35889	8.24599	2.08154	2.70394	1.35889	3.69654			7.38537	4.08347	3.35763				6.05862	1.35889									2.60776	2.5551
50	17.0547	0.120929	2.59034	0.0956888			0.011205	6.07022	1.36602	8.2601	2.09347	2.71617	1.36602	3.70047			7.39745	4.09145	3.36928			-0.011205	6.05902	1.35482	8.2489	2.08227	2.70496	1.35482	3.68927			7.38625	4.08024	3.35807				6.05902	1.35482									2.5911	2.59018
51	17.2578	0.120929	2.60974	0.0962774			0.010302	6.0707	1.36092	8.26358	2.09318	2.71623	1.36092	3.69169			7.39848	4.08784	3.36865			-0.010302	6.0604	1.35062	8.25328	2.08288	2.70592	1.35062	3.68139			7.38818	4.07754	3.35835				6.0604	1.35062									2.53748	2.6275
52	17.4609	0.120929	2.6635	0.103191			0.009982	6.06869	1.35527	8.26484	2.09203	2.71533	1.35527	3.68162			7.39683	4.08268	3.36533			-0.009982	6.05871	1.34529	8.25486	2.08204	2.70535	1.34529	3.67164			7.38685	4.0727	3.35535				6.05871	1.34529									2.60411	2.67681
53	17.6641	0.120929	2.74238	0.116531			0.011612	6.06682	1.35085	8.2655	2.09237	2.71549	1.35085	3.67272			7.3938	4.07782	3.36284			-0.011612	6.05521	1.33924	8.25389	2.08076	2.70387	1.33924	3.6611			7.38219	4.06621	3.35122				6.05521	1.33924									2.78168	2.73596
54	17.8672	0.120929	2.78737	0.123019			0.011889	6.06738	1.34581	8.27064	2.09259	2.71604	1.34581	3.66145			7.39566	4.07341	3.36262			-0.011889	6.05549	1.33392	8.25875	2.0807	2.70415	1.33392	3.64956			7.38377	4.06152	3.35073				6.05549	1.33392									2.76467	2.79149
55	18.0703	0.120929	2.82883	0.12983			0.012101	6.0682	1.34083	8.27633	2.09267	2.7168	1.34083	3.65483			7.39485	4.06916	3.3621			-0.012101	6.0561	1.32873	8.26422	2.08057	2.7047	1.32873	3.64273			7.38274	4.05705	3.35				6.0561	1.32873									2.72969	2.84973
56	18.2734	0.120929	2.92144	0.151644			0.013137	6.06659	1.33583	8.28021	2.09223	2.71717	1.33583	3.64576			7.39333	4.06615	3.36045			-0.013137	6.05345	1.32269	8.26707	2.07909	2.70403	1.32269	3.63263			7.38019	4.05302	3.34731				6.05345	1.32269									2.90631	2.92385
57	18.4766	0.120929	2.98815	0.0945536			0.011954	6.06452	1.32992	8.28303	2.09016	2.71611	1.32992	3.63295			7.39068	4.05991	3.35699			-0.011954	6.05257	1.31797	8.27108	2.07821	2.70415	1.31797	3.621			7.37873	4.04796	3.34504					1.31797										2.98815
58	18.6797	0.120929	2.90636	0.138256			0.011422	6.06557	1.32535	8.29445	2.09043	2.71753	1.32535	3.62614			7.3936	4.05836	3.35856			-0.011422	6.05415	1.31393	8.28303	2.07901	2.7061	1.31393	3.61472			7.38218	4.04694	3.34713				6.05415	1.31393	8.28303								2.85287	3.04873
59	18.8828	0.120929	3.00439	0.124434			0.011899	6.06567	1.32146	8.30489	2.08978	2.71788	1.32146	3.61793			7.39371	4.05483	3.35841			-0.011899	6.05377	1.30956	8.29299	2.07788	2.70599	1.30956	3.60603			7.38181	4.04293	3.34651				6.05377	1.30956	8.29299	2.07788							2.88107	3.122
60	19.0859	0.120929	3.07838	0.12355			0.012471	6.06289	1.31763	8.31095	2.08809	2.71742	1.31763	3.60777			7.39124	4.05236	3.35581			-0.012471	6.05042	1.30516	8.29847	2.07562	2.70494	1.30516	3.5953			7.37877	4.03989	3.34333					1.30516	8.29847	2.07562								3.20668
61	19.2891	0.120929	3.18079	0.118995			0.013662	6.06308	1.31439	8.32102	2.08719	2.71807	1.31439	3.6015			7.39067	4.04917	3.35623			-0.013662	6.04942	1.30073	8.30736	2.07353	2.7044	1.30073	3.58784			7.377	4.0355	3.34257					1.30073	8.30736	2.07353								3.30768
62	19.4922	0.120929	3.32909	0.10804			0.013755	6.06467	1.31153	8.33677	2.08567	2.7186	1.31153	3.59567			7.39144	4.04826	3.35609			-0.013755	6.05092	1.29777	8.32302	2.07192	2.70484	1.29777	3.58191			7.37768	4.03451	3.34233					1.29777	8.32302	2.07192								3.38784
63	19.6953	0.120929	3.41576	0.105907			0.013994	6.06447	1.30973	8.34592	2.08382	2.7192	1.30973	3.59106			7.39114	4.04726	3.35624			-0.013994	6.05047	1.29573	8.33193	2.06983	2.7052	1.29573	3.57707			7.37714	4.03327	3.34224					1.29573	8.33193	2.06983								3.45176
64	19.8984	0.120929	3.56652	0.0975311			0.014093	6.06421	1.30775	8.35935	2.08102	2.71955	1.30775	3.58652			7.39029	4.04708	3.35655			-0.014093	6.05012	1.29366	8.34526	2.06693	2.70546	1.29366	3.57242			7.3762	4.03298	3.34246					1.29366	8.34526	2.06693								3.52659
65	20.1016	0.120929	3.63911	0.0907109			0.014664	6.06165	1.30592	8.36455	2.07703	2.71903	1.30592	3.58143			7.38759	4.04463	3.35385			-0.014664	6.04699	1.29126	8.34989	2.06236	2.70437	1.29126	3.56677			7.37293	4.02996	3.33919					1.29126	8.34989	2.06236								3.63044
66	20.3047	0.120929	3.78774	0.0885079			0.013834	6.06468	1.30439	8.38155	2.07306	2.71979	1.30439	3.57977			7.39093	4.04468	3.35523			-0.013834	6.05085	1.29055	8.36772	2.05922	2.70596	1.29055	3.56594			7.3771	4.03085	3.3414					1.29055	8.36772	2.05922								3.6659
67	20.5078	0.120929	3.91932	0.0870169			0.014688	6.06448	1.30358	8.39554	2.06816	2.72031	1.30358	3.57669			7.38921	4.04537	3.35486			-0.014688	6.0498	1.28889	8.38086	2.05347	2.70563	1.28889	3.56201			7.37453	4.03068	3.34017					1.28889	8.38086	2.05347								3.76181
68	20.7109	0.120929	4.03405	0.0865398			0.014401	6.06501	1.30216	8.40552	2.06141	2.7202	1.30216	3.5742			7.38871	4.04353	3.35382			-0.014401	6.05061	1.28776	8.39112	2.04701	2.7058	1.28776	3.5598			7.37431	4.02913	3.33942					1.28776	8.39112	2.04701								3.84052
69	20.9141	0.120929	4.14283	0.085642			0.015273	6.06443	1.30193	8.41438	2.05431	2.7209	1.30193	3.57296			7.38761	4.04307	3.35405			-0.015273	6.04916	1.28665	8.39911	2.03903	2.70563	1.28665	3.55768			7.37234	4.0278	3.33877						8.39911	2.03903
70	21.1172	0.120929	4.30012	0.0887122			0.015661	6.06389	1.3013	8.42668	2.04354	2.72075	1.3013	3.57134			7.38682	4.04241	3.35308			-0.015661	6.04823	1.28564	8.41102	2.02788	2.70509	1.28564	3.55568			7.37116	4.02675	3.33742						8.41102	2.02788
71	21.3203	0.120929	4.44978	0.0947219			0.015057	6.06558	1.3005	8.4363	2.03136	2.72033	1.3005	3.56982			7.38568	4.04195	3.35251			-0.015057	6.05053	1.28544	8.42124	2.01631	2.70527	1.28544	3.55477			7.37063	4.02689	3.33745						8.42124	2.01631
72	21.5234	0.120929	4.59282	0.0967506			0.01607	6.06582	1.30066	8.44184	2.01689	2.7204	1.30066	3.56924			7.38186	4.04104	3.35066			-0.01607	6.04975	1.28459	8.42577	2.00082	2.70433	1.28459	3.55317			7.36579	4.02497	3.33459						8.42577	2.00082
73	21.7266	0.120929	4.79357	0.107057			0.016863	6.06513	1.30007	8.44751	1.99639	2.71951	1.30007	3.56847			7.3771	4.04015	3.34821			-0.016863	6.04826	1.28321	8.43065	1.97952	2.70265	1.28321	3.55161			7.36024	4.02329	3.33134						8.43065	1.97952
74	21.9297	0.120929	5.08324	0.140618			0.016638	6.0654	1.29948	8.45266	1.97175	2.71814	1.29948	3.56791			7.36876	4.03735	3.34345			-0.016638	6.04876	1.28284	8.43602	1.95511	2.70151	1.28284	3.55127			7.35212	4.02072	3.32681						8.43602	1.95511	2.70151
75	22.1328	0.120929	5.39605	0.181553			0.016485	6.06613	1.2983	8.45653	1.9502	2.7145	1.2983	3.56753			7.35877	4.03436	3.33597			-0.016485	6.04965	1.28181	8.44005	1.93371	2.69801	1.28181	3.55104			7.34228	4.01787	3.31949							1.93371	2.69801
76	22.3359	0.120929	5.70699	0.218851			0.015944	6.06688	1.29602	8.45845	1.93544	2.70767	1.29602	3.56743			7.33101	4.02768	3.3184			-0.015944	6.05093	1.28007	8.44251	1.9195	2.69173	1.28007	3.55149			7.31507	4.01173	3.30245							1.9195	2.69173
77	22.5391	0.120929	5.96276	0.186915			0.016877	6.06562	1.29374	8.45693	1.93058	2.69692	1.29374	3.56719			7.27675	4.02112	3.28087			-0.016877	6.04874	1.27687	8.44006	1.9137	2.68005	1.27687	3.55031			7.25987	4.00425	3.26399							1.9137	2.68005	1.27687
78	22.7422	0.120929	6.29034	0.116426			0.016538	6.06556	1.28934	8.45767	1.92727	2.67148	1.28934	3.56706			7.22256	4.01587	3.26897			-0.016538	6.04903	1.2728	8.44114	1.91073	2.65494	1.2728	3.55052			7.20602	3.99933	3.25243								2.65494	1.2728
79	22.9453	0.120929	6.47371	0.0890224			0.017268	6.06568	1.28382	8.45799	1.92552	2.65442	1.28382	3.56684			7.18011	4.00278	3.27767			-0.017268	6.04841	1.26655	8.44072	1.90825	2.63715	1.26655	3.54957			7.16284	3.98551	3.2604								2.63715	1.26655
80	23.1484	0.120929	6.72795	0.142719			0.017119	6.0664	1.27562	8.45867	1.92492		1.27562	3.56683			7.12298	4.00208	3.26445			-0.017119	6.04928	1.2585	8.44155	1.9078		1.2585	3.54971			7.10586	3.98496	3.24734									1.2585
81	23.3516	0.120929	6.94944	0.0984432			0.017483	6.0655	1.2631	8.45808	1.92464		1.2631	3.56665			7.09307	3.99722	3.25477			-0.017483	6.04801	1.24561	8.4406	1.90715		1.24561	3.54917			7.07558	3.97973	3.23729									1.24561
82	23.5547	0.120929	7.18837	0.0636341			0.017615	6.06579	1.25048	8.45814	1.92438	2.54866	1.25048	3.56632	2.60986		7.07951	3.98976	3.24346			-0.017615	6.04818	1.23286	8.44053	1.90676	2.53105	1.23286	3.54871	2.59225		7.0619	3.97215	3.22584								2.53105	1.23286
83	23.7578	0.120929	7.46172	0.0624119			0.017518	6.06666	1.21164	8.45808	1.92441	2.52764	1.21164	3.56556	2.61001		7.0679	3.98586	3.23443			-0.017518	6.04914	1.19412	8.44056	1.90689	2.51012	1.19412	3.54804	2.59249		7.05039	3.96834	3.21691								2.51012	1.19412
84	23.9609	0.120929	7.72147	0.0744477			0.01686	6.06668	1.18204	8.45866	1.92412	2.50455	1.18204	3.56366	2.60956		7.05439	3.97946	3.22524			-0.01686	6.04982	1.16518	8.4418	1.90726	2.48769	1.16518	3.5468	2.5927		7.03753	3.9626	3.20838								2.48769	1.16518
85	24.1641	0.120929	7.99731	0.0989231			0.017516	6.06629	1.15274	8.45875	1.92425	2.49055	1.15274	3.56077	2.60954		7.04677	3.96068	3.21638			-0.017516	6.04877	1.13522	8.44123	1.90673	2.47303	1.13522	3.54326	2.59202		7.02925	3.94316	3.19887								2.47303	1.13522	3.54326
86	24.3672	0.120929	8.24342	0.141742			0.01775	6.06621	1.12762	8.45877	1.92422	2.48358	1.12762	3.55624	2.60918		7.04118	3.9496	3.2083			-0.01775	6.04846	1.10987	8.44102	1.90647	2.46583	1.10987	3.53849	2.59143		7.02343	3.93185	3.19055								2.46583	1.10987	3.53849
87	24.5703	0.120929	8.44749	0.151193			0.017658	6.06562	1.11363	8.45803	1.92405	2.47889	1.11363	3.54861	2.60823		7.03054	3.9233	3.1767			-0.017658	6.04797	1.09598	8.44037	1.9064	2.46123	1.09598	3.53096	2.59057		7.01288	3.90564	3.15904									1.09598	3.53096
88	24.7734	0.120929	8.63221	0.138997			0.01742	6.06627	1.1053	8.45915	1.92415	2.47649	1.1053	3.53708	2.60722		7.02181	3.88182	3.15561			-0.01742	6.04885	1.08788	8.44173	1.90673	2.45907	1.08788	3.51966	2.5898		7.00439	3.8644	3.13819									1.08788	3.51966
89	24.9766	0.120929	8.81593	0.117651			0.017562	6.06614	1.09993	8.45899	1.92407	2.47493	1.09993	3.52175	2.60563		7.00525	3.83303	3.13036			-0.017562	6.04858	1.08237	8.44143	1.90651	2.45737	1.08237	3.50419	2.58807		6.98769	3.81547	3.1128									1.08237	3.50419	2.58807
90	25.1797	0.120929	8.99269	0.0957248			0.017171	6.06643	1.09628	8.45974	1.92393	2.47425	1.09628	3.50118	2.60394		6.99782	3.8031	3.11372			-0.017171	6.04925	1.07911	8.44257	1.90676	2.45708	1.07911	3.48401	2.58677		6.98065	3.78593	3.09655									1.07911	3.48401	2.58677
91	25.3828	0.120929	9.17125	0.0761324			0.017158	6.06627	1.09421	8.45959	1.92396	2.47386	1.09421	3.47767	2.60172		6.98762	3.76803	3.08239			-0.017158	6.04911	1.07705	8.44243	1.9068	2.4567	1.07705	3.46052	2.58457		6.97047	3.75087	3.06523									1.07705	3.46052	2.58457
92	25.5859	0.120929	9.31934	0.0636751			0.017264	6.06656	1.09274	8.45946	1.92391	2.47358	1.09274	3.45234	2.59878		6.97572	3.71896	3.07016			-0.017264	6.0493	1.07548	8.4422	1.90664	2.45632	1.07548	3.43507	2.58152		6.95846	3.70169	3.0529										3.43507	2.58152
93	25.7891	0.120929	9.4531	0.0561922			0.017367	6.06634	1.09196	8.45859	1.92385	2.47342	1.09196	3.42648	2.59522		6.96496	3.67771	3.03781			-0.017367	6.04897	1.0746	8.44122	1.90648	2.45605	1.0746	3.40911	2.57786		6.9476	3.66034	3.02044										3.40911	2.57786
94	25.9922	0.120929	9.58	0.0517582			0.017715	6.06644	1.09151	8.45844	1.92406	2.47343	1.09151	3.39984	2.59154		6.95784	3.63884	3.02339			-0.017715	6.04872	1.07379	8.44072	1.90634	2.45571	1.07379	3.38212	2.57382		6.94012	3.62112	3.00568										3.38212	2.57382
95	26.1953	0.120929	9.70462	0.0494343			0.017476	6.06581	1.09082	8.45826	1.92382	2.47303	1.09082	3.37186	2.58664		6.95109	3.62554	3.01733			-0.017476	6.04834	1.07334	8.44078	1.90635	2.45556	1.07334	3.35438	2.56916		6.93361	3.60806	2.99985										3.35438	2.56916
96	26.3984	0.120929	9.78309	0.0480803			0.016935	6.06635	1.09026	8.45986	1.92374	2.473	1.09026	3.35559	2.58089		6.94754	3.60203	3.01293			-0.016935	6.04942	1.07333	8.44292	1.9068	2.45606	1.07333	3.33866	2.56396		6.9306	3.58509	2.996										3.33866	2.56396
97	26.6016	0.120929	9.90832	0.0477212			0.01716	6.06599	1.08991	8.45894	1.92363	2.47269	1.08991	3.3293	2.57363		6.94235	3.57951	3.00232			-0.01716	6.04883	1.07275	8.44178	1.90647	2.45553	1.07275	3.31214	2.55647		6.92519	3.56235	2.98516										3.31214	2.55647
98	26.8047	0.120929	10.0091	0.0483947			0.016913	6.06564	1.08971	8.45855	1.92353	2.47261	1.08971	3.30836	2.56669		6.93867	3.57034	2.99386			-0.016913	6.04873	1.07279	8.44163	1.90662	2.45569	1.07279	3.29144	2.54978		6.92176	3.55343	2.97695										3.29144	2.54978
99	27.0078	0.120929	10.0978	0.0485064			0.016785	6.06587	1.08954	8.45903	1.92352	2.47267	1.08954	3.293	2.55786		6.93607	3.55617	2.98712			-0.016785	6.04909	1.07276	8.44225	1.90673	2.45588	1.07276	3.27622	2.54108		6.91928	3.53939	2.97033										3.27622	2.54108
100	27.2109	0.120929	10.1874	0.0492984			0.016833	6.06515	1.08929	8.45821	1.92334	2.47238	1.08929	3.27803	2.54898		6.93312	3.54962	2.98016			-0.016833	6.04831	1.07246	8.44138	1.90651	2.45555	1.07246	3.2612	2.53215		6.91629	3.53279	2.96333										3.2612	2.53215
101	27.4141	0.120929	10.274	0.0501086			0.016834	6.06499	1.08921	8.45795	1.92333	2.47233	1.08921	3.26507	2.53906		6.931	3.54346	2.97649			-0.016834	6.04816	1.07238	8.44111	1.9065	2.45549	1.07238	3.24824	2.52223		6.91416	3.52663	2.95966										3.24824	2.52223
102	27.6172	0.120929	10.3622	0.0500373			0.016997	6.0656	1.08913	8.45848	1.92338	2.47249	1.08913	3.25534	2.52613		6.92971	3.53757	2.97605			-0.016997	6.0486	1.07214	8.44148	1.90638	2.45549	1.07214	3.23834	2.50913		6.91272	3.52058	2.95905										3.23834	2.50913
103	27.8203	0.120929	10.4342	0.0513437			0.016757	6.06574	1.08891	8.45892	1.92319	2.47235	1.08891	3.24562	2.51678		6.9286	3.5321	2.97336			-0.016757	6.04899	1.07215	8.44216	1.90644	2.45559	1.07215	3.22887	2.50002		6.91185	3.51534	2.9566										3.22887	2.50002
104	28.0234	0.120929	10.5089	0.0522858			0.016447	6.0654	1.08858	8.45899	1.92291	2.47216	1.08858	3.23748	2.5053		6.92795	3.52926	2.97103			-0.016447	6.04896	1.07213	8.44255	1.90646	2.45571	1.07213	3.22103	2.48885		6.9115	3.51281	2.95459										3.22103	2.48885
105	28.2266	0.120929	10.5817	0.0532817			0.016728	6.06536	1.08853	8.45849	1.92286	2.47205	1.08853	3.2312	2.49388		6.92687	3.52576	2.96863			-0.016728	6.04864	1.0718	8.44177	1.90613	2.45532	1.0718	3.21447	2.47715		6.91014	3.50903	2.95191										3.21447	2.47715
106	28.4297	0.120929	10.6939	0.0539059			0.016397	6.06473	1.08828	8.45719	1.92255	2.47153	1.08828	3.22513	2.4718		6.92521	3.52275	2.96702			-0.016397	6.04833	1.07188	8.44079	1.90615	2.45513	1.07188	3.20874	2.4554		6.90881	3.50635	2.95062										3.20874	2.4554
107	28.6328	0.120929	10.7118	0.0558421			0.016248	6.06462	1.08811	8.45735	1.92242	2.47064	1.08811	3.22083	2.47153		6.92504	3.52003	2.96658			-0.016248	6.04837	1.07186	8.44111	1.90617	2.45439	1.07186	3.20458	2.45528		6.90879	3.50378	2.95033										3.20458	2.45528
108	28.8359	0.120929	10.7281	0.0575404			0.016017	6.06448	1.08781	8.4574	1.92225	2.4542	1.08781	3.21719	2.47064		6.92478	3.51897	2.96544			-0.016017	6.04846	1.07179	8.44138	1.90623	2.43819	1.07179	3.20118	2.45462		6.90876	3.50295	2.94942										3.20118	2.45462
109	29.0391	0.120929	10.8165	0.0587789			0.015384	6.06399	1.08735	8.45715	1.92186	2.45242	1.08735	3.2138	2.45242		6.92391	3.51757	2.96418			-0.015384	6.04861	1.07197	8.44177	1.90647	2.43703	1.07197	3.19842	2.43703		6.90853	3.50219	2.94879										3.19842	2.43703
110	29.2422	0.120929	10.864	0.0606021			0.015289	6.0633	1.08718	8.4561	1.92153	2.44423	1.08718	3.21112	2.44423		6.92321	3.51596	2.96271			-0.015289	6.04801	1.07189	8.44081	1.90624	2.42894	1.07189	3.19583	2.42894		6.90793	3.50067	2.94742										3.19583	2.42894
111	29.4453	0.120929	10.8959	0.0622703			0.014985	6.06308	1.08681	8.45619	1.92119	2.43898	1.08681	3.20871	2.43898		6.92274	3.51537	2.96246			-0.014985	6.04809	1.07183	8.4412	1.9062	2.42399	1.07183	3.19373	2.42399		6.90776	3.50038	2.94748										3.19373	2.42399
112	29.6484	0.120929	10.9321	0.0638219			0.014748	6.06341	1.08665	8.45663	1.92111	2.43238	1.08665	3.20712	2.43238		6.92285	3.51455	2.96202			-0.014748	6.04867	1.0719	8.44188	1.90637	2.41763	1.0719	3.19237	2.41763		6.9081	3.4998	2.94727										3.19237	2.41763
113	29.8516	0.120929	10.9672	0.0652886			0.01415	6.06471	1.08624	8.45687	1.92093	2.42532	1.08624	3.2057	2.42532		6.92392	3.51373	2.96148			-0.01415	6.05056	1.07209	8.44272	1.90678	2.41117	1.07209	3.19155	2.41117		6.90977	3.49958	2.94733										3.19155	2.41117
114	30.0547	0.120929	11.0132	0.0683033			0.014151	6.06314	1.08588	8.45478	1.92032	2.41823	1.08588	3.20343	2.41823		6.92166	3.51197	2.95657			-0.014151	6.04899	1.07173	8.44063	1.90616	2.40408	1.07173	3.18928	2.40408		6.9075	3.49782	2.94242										3.18928	2.40408
115	30.2578	0.120929	11.0317	0.0697941			0.01433	6.06234	1.08605	8.45447	1.92056	2.41582	1.08605	3.20248	2.41582		6.92126	3.51179	2.96018			-0.01433	6.04801	1.07172	8.44014	1.90623	2.40149	1.07172	3.18815	2.40149		6.90693	3.49746	2.94585										3.18815	2.40149
116	30.4609	0.120929	11.0524	0.0708427			0.013584	6.06278	1.08557	8.45704	1.92027	2.41127	1.08557	3.20163	2.41127		6.92177	3.51169	2.96023			-0.013584	6.04919	1.07199	8.44346	1.90668	2.39768	1.07199	3.18804	2.39768		6.90819	3.49811	2.94664										3.18804	2.39768
117	30.6641	0.120929	11.0811	0.0724835			0.013011	6.06355	1.08514	8.45488	1.91995	2.40554	1.08514	3.20087	2.40554		6.9225	3.51097	2.95941			-0.013011	6.05054	1.07212	8.44187	1.90694	2.39253	1.07212	3.18786	2.39253		6.90949	3.49796	2.9464										3.18786	2.39253
118	30.8672	0.120929	11.1122	0.0761866			0.013755	6.0603	1.08522	8.4531	1.91945	2.40301	1.08522	3.19886	2.40301		6.91891	3.49813	2.95824			-0.013755	6.04654	1.07146	8.43934	1.90569	2.38925	1.07146	3.1851	2.38925		6.90516	3.48437	2.94448										3.1851	2.38925
119	31.0703	0.120929	11.1235	0.0762181			0.012786	6.06149	1.08496	8.45352	1.91949	2.3993	1.08496	3.19889	2.3993		6.92067	3.50949	2.95919			-0.012786	6.0487	1.07217	8.44074	1.9067	2.38651	1.07217	3.1861	2.38651		6.90789	3.4967	2.94641										3.1861	2.38651
120	31.2734	0.120929	11.137	0.0771628			0.012437	6.06265	1.08477	8.45809	1.91948	2.39662	1.08477	3.19851	2.39662		6.92072	3.50978	2.95906			-0.012437	6.05022	1.07233	8.44565	1.90704	2.38419	1.07233	3.18608	2.38419		6.90828	3.49734	2.94662										3.18608	2.38419
121	31.4766	0.120929	11.1595	0.0795099			0.012535	6.06202	1.08456	8.45475	1.91921	2.39379	1.08456	3.19758	2.39379		6.91999	3.50908	2.95834			-0.012535	6.04949	1.07203	8.44221	1.90667	2.38126	1.07203	3.18504	2.38126		6.90745	3.49654	2.9458										3.18504	2.38126
122	31.6797	0.120929	11.1818	0.0818329			0.011887	6.06088	1.08394	8.45456	1.91875	2.39011	1.08394	3.19615	2.39011		6.91926	3.50719	2.95818			-0.011887	6.049	1.07205	8.44267	1.90687	2.37822	1.07205	3.18426	2.37822		6.90737	3.4953	2.9463										3.18426	2.37822
123	31.8828	0.120929	11.1987	0.083462			0.011775	6.05975	1.08401	8.45602	1.91862	2.3875	1.08401	3.19577	2.3875		6.91914	3.50684	2.95827			-0.011775	6.04797	1.07224	8.44425	1.90684	2.37572	1.07224	3.18399	2.37572		6.90737	3.49506	2.94649										3.18399	2.37572
124	32.0859	0.120929	11.2231	0.0867834			0.012967	6.0593	1.08428	8.45264	1.91861	2.3859	1.08428	3.19558	2.3859		6.91828	3.50766	2.9621			-0.012967	6.04634	1.07131	8.43967	1.90565	2.37293	1.07131	3.18261	2.37293		6.90532	3.4947	2.94914										3.18261	2.37293
125	32.2891	0.120929	11.2471	0.0902625			0.012878	6.05836	1.08358	8.45153	1.91818	2.38296	1.08358	3.19428	2.38296		6.91662	3.49558	2.95209			-0.012878	6.04548	1.0707	8.43865	1.9053	2.37009	1.0707	3.18141	2.37009		6.90374	3.4827	2.93921										3.18141	2.37009
126	32.4922	0.120929	11.2226	0.0852128			0.010357	6.06144	1.08324	8.45176	1.91793	2.38182	1.08324	3.19492	2.38182		6.91877	3.50617	3.00314			-0.010357	6.05108	1.07288	8.4414	1.90757	2.37147	1.07288	3.18456	2.37147		6.90842	3.49581	2.99278										3.18456	2.37147
127	32.6953	0.120929	11.2364	0.0864113			0.00948	6.06067	1.08214	8.4519	1.91695	2.37857	1.08214	3.19426	2.37857		6.91777	3.49449	3.0023			-0.00948	6.05119	1.07266	8.44242	1.90747	2.36909	1.07266	3.18478	2.36909		6.90829	3.48501	2.99282										3.18478	2.36909
128	32.8984	0.120929	11.2619	0.0906866			0.010779	5.9797	1.08125	8.48068	1.91665	2.37795	1.08125	3.19334	2.37795		6.91225	3.49487	2.99698			-0.010779	5.96892	1.07047	8.4699	1.90587	2.36717	1.07047	3.18256	2.36717		6.90147	3.48409	2.9862										3.18256	2.36717
[truncated: 71 more columns]

## Sheet: pKa fitting
									pK1,0	1.39082	DpK1,0	0.125452			Solver model for fit to extract pKa values														Fitting to extract uncertainty in fitted pKa values	pK2,0	1.51628							pK2,0	1.51085						pK2,0	1.4318
									pK2,0	6.12409	DpK2,0	0.066059			No constraints	dH3 constrained	dH3 and dL3 constrained									Solver error analysis fit unconstrained	Solver error analysis fit dH3 constrained			pK2,0	6.11614							pK2,0	6.18219						pK2,0	6.16299
									pK3,0	9.27299	DpK3,0	0.0106684			FALSE	FALSE	FALSE									FALSE	FALSE			pK3,0	9.27456							pK3,0	9.28366						pK3,0	9.28294
															15	15	15									45	45
									Dz2 pK1	3					100	TRUE	TRUE									100	TRUE			Dz2 pK1 (linked)	3							Dz2 pK1 (linked)	3						Dz2 pK1 (linked)	3
									Dz2 pK2	1					100	TRUE	TRUE									100	TRUE			Dz2 pK2 (linked)	1							Dz2 pK2 (linked)	1						Dz2 pK2 (linked)	1
									Dz2 pK3	-1						TRUE	TRUE										TRUE			Dz2 pK3 (linked)	-1							Dz2 pK3 (linked)	-1						Dz2 pK3 (linked)	-1
																100	TRUE										TRUE
																100	TRUE										TRUE
									Iterate on these with Solver to adjust overall R2 to 1								FALSE										TRUE			Iterate on these with Solver to adjust overall R2 to 1								Iterate on these with Solver to adjust overall R2 to 1							Iterate on these with Solver to adjust overall R2 to 1
									pK1	1.74932							100										TRUE			pK1	1.87477							pK1	1.86934						pK1	1.7903
									pK2	6.24358							100										TRUE			pK2	6.23563							pK2	6.30169						pK2	6.28249
									pK3	9.15349																	TRUE			pK3	9.15506							pK3	9.16416						pK3	9.16344
																Initial guesses (copy and paste values)											100
									dH3/ppm	7.45173	4.47637	3.48371				pK1	2										100			dH3/ppm	7.43875	4.39293	3.45735					dH3/ppm	7.43929	4.39305	3.45722				dH3/ppm	7.44772	4.44064	3.47295
									dH2L/ppm	7.37681	4.02335	3.33736				pK2	6													dH2L/ppm	7.37605	4.02134	3.33647					dH2L/ppm	7.3761	4.02287	3.33704				dH2L/ppm	7.37614	4.02354	3.33715
									dHL2/ppm	7.03058	3.97741	3.20765				pK3	9													dHL2/ppm	7.03077	3.97754	3.20773					dHL2/ppm	7.02864	3.976	3.20621				dHL2/ppm	7.02915	3.97462	3.20602
									dL3/ppm	6.9061	3.49224	2.94194																		dL3/ppm	6.90607	3.49223	2.94197					dL3/ppm	6.90623	3.49205	2.94193				dL3/ppm	6.90607	3.49184	2.94176
									Constraint for dH3/ppm:	7.90516	4.48437	3.94242				dH3/ppm	7.40367	4.18192	3.38832									R2 (all three sets of parameters):	0.993734	Constraint for dH3/ppm:	7.90516	4.48437	3.94242					Constraint for dH3/ppm:	7.90516	4.48437	3.94242				Constraint for dH3/ppm:	7.90516	4.48437	3.94242
									Constraint for dL3/ppm:	6.40367	3.18192	2.38832				dH2L/ppm	7.15441	3.83314	3.16537											Constraint for dL3/ppm:	6.40367	3.18192	2.38832					Constraint for dL3/ppm:	6.40367	3.18192	2.38832				Constraint for dL3/ppm:	6.40367	3.18192	2.38832
Average ionic strength/M:	0.120929								R2 (Optimise to 1 with Solver):	0.998808						dHL2/ppm	7.02978	3.65876	3.05389											R2 (all resonances):	0.997704							R2 (all resonances):	0.997899						R2 (all resonances):	0.998131
These are copied from the pH spreadsheet					Referenced analyte shifts				R2 (each resonance):	0.999798	0.999745	0.999265				dL3/ppm	6.90516	3.48437	2.94242											R2 (each resonance):	0.999725	0.999177	0.998801					R2 (each resonance):	0.999597	0.999252	0.99905				R2 (each resonance):	0.999833	0.999298	0.999
	Row on CSI image	Height from tube base/mm	pH		His imid up	His alpha	His beta dnfield			His imid up	His alpha	His beta dnfield																	pH + random error 1		His imid up	His alpha	His beta dnfield				pH + random error 2		His imid up	His alpha	His beta dnfield			pH + random error 3		His imid up	His alpha	His beta dnfield
	20	10.9609	2.03542		7.40203	4.18112	3.38684			7.40234	4.17783	3.38726																	1.99447		7.4031	4.18168	3.38863				2.05541		7.40102	4.1689	3.38444			2.09516		7.39985	4.16175	3.38214
	21	11.1641	2.03501		7.40367	4.18192	3.38832			7.40236	4.17793	3.38729																	1.99969		7.40291	4.18059	3.38827				2.04781		7.40128	4.17045	3.38495			1.99621		7.40359	4.18355	3.38924
	22	11.3672	2.05447		7.40038	4.17447	3.38575			7.40161	4.1734	3.38583																	2.02432		7.40205	4.17545	3.3866				1.99524		7.40314	4.18132	3.38847			2.06539		7.40095	4.16815	3.38423
	23	11.5703	2.06042		7.3998	4.17385	3.3849			7.40138	4.17202	3.38539																	2.01171		7.40249	4.17807	3.38745				2.08084		7.40014	4.16376	3.38277			2.08534		7.40021	4.16384	3.38282
	24	11.7734	2.04974		7.40166	4.17644	3.38497			7.40179	4.17449	3.38618																	2.00029		7.40289	4.18046	3.38823				2.00271		7.40287	4.17976	3.38797			2.11021		7.3993	4.15856	3.3811
	25	11.9766	2.07016		7.39932	4.16668	3.38241			7.40101	4.16979	3.38466																	2.0576		7.40089	4.16858	3.38437				2.05233		7.40112	4.16953	3.38465			2.06955		7.40079	4.16725	3.38393
	26	12.1797	2.08428		7.39864	4.16615	3.38199			7.40048	4.16659	3.38363																	2.0969		7.39954	4.16062	3.38177				2.05228		7.40113	4.16954	3.38465			2.07118		7.40073	4.1669	3.38382
	27	12.3828	2.09703		7.4001	4.1682	3.38208			7.4	4.16373	3.38271																	2.15277		7.39768	4.14961	3.37819				2.13375		7.39835	4.15329	3.37937			2.06988		7.40078	4.16718	3.38391
	28	12.5859	2.09223		7.40285	4.16493	3.38291			7.40018	4.1648	3.38305																	2.15072		7.39775	4.15001	3.37832				2.11458		7.39899	4.15704	3.38059			2.12134		7.3989	4.15623	3.38035
	29	12.7891	2.11401		7.40053	4.1643	3.38205			7.39938	4.15997	3.38149																	2.05204		7.40108	4.16972	3.38474				2.09379		7.39969	4.16116	3.38193			2.04972		7.40153	4.17158	3.38534
	30	12.9922	2.12004		7.39904	4.16287	3.38054			7.39916	4.15865	3.38106																	2.09687		7.39954	4.16063	3.38178				2.12085		7.39878	4.15581	3.38019			2.12017		7.39894	4.15648	3.38043
	31	13.1953	2.12182		7.39954	4.15637	3.37924			7.3991	4.15826	3.38094																	2.1616		7.39739	4.14791	3.37764				2.08837		7.39988	4.16225	3.38228			2.06808		7.40085	4.16757	3.38404
	32	13.3984	2.14011		7.40019	4.152	3.37961			7.39844	4.1543	3.37966																	2.19928		7.39619	4.14077	3.37531				2.19931		7.39622	4.14084	3.37533			2.08972		7.40004	4.16291	3.38252
	33	13.6016	2.16913		7.39706	4.14872	3.37767			7.39743	4.14817	3.37768																	2.16086		7.39742	4.14805	3.37768				2.10774		7.39922	4.15839	3.38103			2.21808		7.39558	4.13694	3.37406
	34	13.8047	2.17373		7.3987	4.14416	3.3778			7.39727	4.14722	3.37737																	2.21164		7.3958	4.13847	3.37457				2.13723		7.39823	4.15261	3.37915			2.15394		7.39775	4.14953	3.37816
	35	14.0078	2.1936		7.39616	4.14258	3.37711			7.39659	4.14314	3.37605																	2.17367		7.397	4.1456	3.37689				2.19044		7.3965	4.14249	3.37586			2.18786		7.39658	4.14277	3.37596
	36	14.2109	2.22174		7.39504	4.14226	3.37498			7.39566	4.13752	3.37424																	2.22339		7.39543	4.13631	3.37386				2.22497		7.39542	4.13614	3.3738			2.19003		7.39651	4.14235	3.37582
	37	14.4141	2.23871		7.39561	4.13396	3.37369			7.39511	4.13421	3.37317																	2.20342		7.39605	4.14	3.37506				2.26831		7.3941	4.12845	3.3713			2.22995		7.3952	4.13469	3.37333
	38	14.6172	2.26813		7.39247	4.13061	3.37174			7.39419	4.12864	3.37137																	2.25218		7.39455	4.13112	3.37217				2.24073		7.39493	4.13331	3.37288			2.29069		7.3933	4.12367	3.36974
	39	14.8203	2.26389		7.39645	4.13056	3.3735			7.39432	4.12943	3.37162																	2.1917		7.39642	4.14219	3.37578				2.27743		7.39383	4.12687	3.37079			2.23366		7.39508	4.134	3.3731
	40	15.0234	2.27049		7.39743	4.12824	3.37356			7.39412	4.1282	3.37122																	2.29501		7.39329	4.12364	3.36974				2.19972		7.39621	4.14076	3.3753			2.24637		7.39467	4.13164	3.37234
	41	15.2266	2.30913		7.39273	4.11897	3.36976			7.39296	4.1212	3.36896																	2.32904		7.39232	4.11794	3.36788				2.36697		7.39131	4.11217	3.36602			2.30831		7.39277	4.12061	3.36874
	42	15.4297	2.33374		7.39224	4.11657	3.36818			7.39225	4.11692	3.36758																	2.33906		7.39205	4.1163	3.36735				2.26613		7.39417	4.12883	3.37143			2.25833		7.39429	4.12945	3.37162
	43	15.6328	2.36763		7.3892	4.1105	3.36546			7.39131	4.11126	3.36575																	2.41045		7.39016	4.10514	3.36372				2.33691		7.39213	4.11694	3.36757			2.30408		7.3929	4.12134	3.36898
	44	15.8359	2.38472		7.38987	4.10785	3.36404			7.39085	4.10851	3.36486																	2.3667		7.3913	4.11187	3.36591				2.42081		7.38992	4.10404	3.36337			2.45899		7.38874	4.09717	3.36111
	45	16.0391	2.40536		7.39104	4.10563	3.36447			7.39031	4.10527	3.36381																	2.38376		7.39084	4.1092	3.36504				2.46028		7.38896	4.09842	3.36155			2.36931		7.39104	4.11054	3.36546
	46	16.2422	2.45124		7.38976	4.09953	3.36336			7.38917	4.09841	3.3616																	2.50176		7.38797	4.09228	3.35953				2.41998		7.38994	4.10416	3.36341			2.44829		7.389	4.09868	3.3616
	47	16.4453	2.47491		7.38928	4.09418	3.36153			7.38862	4.09506	3.36051																	2.41712		7.38999	4.10415	3.3634				2.49754		7.3881	4.09339	3.35992			2.55227		7.38664	4.08503	3.35715
	48	16.6484	2.5086		7.38913	4.09135	3.35974			7.38786	4.0905	3.35904																	2.56787		7.38656	4.08395	3.35682				2.43758		7.38951	4.10162	3.36259			2.51104		7.38753	4.09018	3.35883
	49	16.8516	2.56386		7.38537	4.08347	3.35763			7.3867	4.08354	3.35679																	2.50954		7.3878	4.09126	3.3592				2.48347		7.38842	4.09526	3.36052			2.56142		7.38645	4.08394	3.35679
	50	17.0547	2.59034		7.38625	4.08024	3.35807			7.38618	4.08043	3.35578																	2.6804		7.38445	4.07158	3.35279				2.67212		7.38463	4.07322	3.35336			2.53545		7.387	4.08709	3.35782
	51	17.2578	2.60974		7.38818	4.07754	3.35835			7.38581	4.07823	3.35507																	2.63206		7.38531	4.07662	3.35443				2.69712		7.3842	4.07076	3.35256			2.5829		7.38602	4.08142	3.35598
	52	17.4609	2.6635		7.38685	4.0727	3.35535			7.38486	4.07254	3.35323																	2.72488		7.38372	4.06729	3.35139				2.65679		7.3849	4.07477	3.35386			2.70926		7.38376	4.06837	3.35172
	53	17.6641	2.74238		7.38219	4.06621	3.35122			7.38362	4.06511	3.35082																	2.64969		7.38499	4.07474	3.35382				2.81593		7.38242	4.06046	3.3492			2.64197		7.3849	4.07497	3.35387
	54	17.8672	2.78737		7.38377	4.06152	3.35073			7.38298	4.06134	3.3496																	2.71146		7.38393	4.06855	3.3518				2.75695		7.38326	4.0653	3.35078			2.67633		7.3843	4.0715	3.35274
	55	18.0703	2.82883		7.38274	4.05705	3.35			7.38244	4.05815	3.34856																	2.74624		7.38338	4.06535	3.35075				2.88938		7.38149	4.05511	3.34746			2.84999		7.38176	4.05695	3.34799
	56	18.2734	2.92144		7.38019	4.05302	3.34731			7.38137	4.05188	3.34653																	2.79753		7.38263	4.06096	3.34932				2.95421		7.38076	4.05097	3.34611			3.05986		7.3796	4.04477	3.344
	57	18.4766	2.98815		7.37873	4.04796	3.34504			7.38071	4.04803	3.34528																	2.89775		7.38134	4.0535	3.34688				3.01023		7.3802	4.0478	3.34507			2.95332		7.38059	4.05032	3.34582
	58	18.6797	2.90636		7.38218	4.04694	3.34713			7.38153	4.05282	3.34683																	2.78288		7.38284	4.06218	3.34972				2.81844		7.38239	4.06026	3.34914			3.00281		7.3801	4.04759	3.34492
	59	18.8828	3.00439		7.38181	4.04293	3.34651			7.38056	4.04717	3.34499																	2.96648		7.38058	4.04913	3.34546				3.08		7.37957	4.0443	3.34393			3.08963		7.37935	4.04343	3.34356
	60	19.0859	3.07838		7.37877	4.03989	3.34333			7.37993	4.04359	3.34383																	2.98568		7.38038	4.04801	3.34509				3.08829		7.3795	4.04392	3.3438			3.1469		7.37891	4.04107	3.34278
	61	19.2891	3.18079		7.377	4.0355	3.34257			7.37919	4.03948	3.34248																	3.10783		7.37927	4.04182	3.34305				3.06351		7.37971	4.04508	3.34418			3.17693		7.3787	4.03994	3.3424
	62	19.4922	3.32909		7.37768	4.03451	3.34233			7.37831	4.0349	3.34096																	3.40365		7.37736	4.03194	3.33976				3.40501		7.37746	4.03328	3.34027			3.30346		7.37792	4.03589	3.34105
	63	19.6953	3.41576		7.37714	4.03327	3.34224			7.37788	4.03283	3.34026																	3.42309		7.37726	4.03148	3.3396				3.3337		7.37784	4.0351	3.34088			3.32018		7.37783	4.03543	3.3409
	64	19.8984	3.56652		7.3762	4.03298	3.34246			7.37721	4.03004	3.33929																	3.50055		7.37688	4.02983	3.33903				3.48354		7.37709	4.03158	3.33969			3.53147		7.37681	4.03087	3.33934
	65	20.1016	3.63911		7.37293	4.02996	3.33919			7.37691	4.02899	3.3389																	3.59073		7.37647	4.02824	3.33846				3.64693		7.37638	4.02883	3.33872			3.57392		7.37663	4.03018	3.33909
	66	20.3047	3.78774		7.3771	4.03085	3.3414			7.37629	4.02729	3.33824																	3.73899		7.37582	4.02619	3.33769				3.7094		7.37613	4.02802	3.33842			3.79681		7.37572	4.02743	3.33805
	67	20.5078	3.91932		7.37453	4.03068	3.34017			7.37568	4.02617	3.33773																	3.86604		7.37523	4.02489	3.33714				3.92165		7.37523	4.02592	3.33755			3.96499		7.37497	4.02606	3.33742
	68	20.7109	4.03405		7.37431	4.02913	3.33942			7.37508	4.0254	3.33732																	4.00117		7.37453	4.02383	3.33662				4.1132		7.37424	4.02466	3.33688			3.95738		7.375	4.02611	3.33745
	69	20.9141	4.14283		7.37234	4.0278	3.33877			7.37439	4.0248	3.33693																	4.06091		7.37418	4.02344	3.3364				4.10312		7.37429	4.02471	3.33691			4.14089		7.37398	4.02503	3.33681
	70	21.1172	4.30012		7.37116	4.02675	3.33742			7.37312	4.02409	3.33631																	4.2539		7.37276	4.02242	3.33564				4.23461		7.37343	4.02405	3.33644			4.24447		7.37325	4.02454	3.33643
	71	21.3203	4.44978		7.37063	4.02689	3.33745			7.37148	4.02351	3.3356																	4.40327		7.37125	4.02178	3.33496				4.38246		7.37217	4.02344	3.33585			4.46568		7.37109	4.02367	3.33547
	72	21.5234	4.59282		7.36579	4.02497	3.33459			7.36935	4.02298	3.33474																	4.65502		7.36733	4.02082	3.33338				4.53256		7.37044	4.02288	3.33511			4.5014		7.37064	4.02354	3.33528
	73	21.7266	4.79357		7.36024	4.02329	3.33134			7.36502	4.02217	3.33305																	4.75643		7.36506	4.0204	3.33249				4.7159		7.36741	4.0222	3.3339			4.69884		7.36742	4.02279	3.33398
	74	21.9297	5.08324		7.35212	4.02072	3.32681			7.35446	4.02058	3.32904																	4.96079		7.3587	4.01942	3.33008				5.19327		7.35103	4.01965	3.32763			5.18174		7.35068	4.0201	3.32757
	75	22.1328	5.39605		7.34228	4.01787	3.31949			7.33375	4.01772	3.32125																	5.42044		7.33024	4.0156	3.31941				5.33913		7.34198	4.01837	3.32421			5.31597		7.34234	4.01887	3.3244
	76	22.3359	5.70699		7.31507	4.01173	3.30245			7.29881	4.013	3.30814																	5.62398		7.30821	4.01276	3.31117				5.78313		7.29528	4.01196	3.30659			5.72273		7.30116	4.01297	3.30881
	77	22.5391	5.96276		7.25987	4.00425	3.26399			7.25772	4.00746	3.29271																	5.99503		7.24997	4.00524	3.28941				5.9951		7.2612	4.00729	3.29373			6.01987		7.25348	4.00614	3.29074
	78	22.7422	6.29034		7.20602	3.99933	3.25243			7.19418	3.99879	3.26879																	6.19286		7.21176	4.00026	3.2751				6.40385		7.18177	3.99621	3.26365			6.25282		7.2084	3.99962	3.27363
	79	22.9453	6.47371		7.16284	3.98551	3.2604			7.15854	3.99378	3.25531																	6.53376		7.146	3.99141	3.25034				6.45445		7.17183	3.99479	3.25987			6.53093		7.15397	3.99152	3.25286
	80	23.1484	6.72795		7.10586	3.98496	3.24734			7.11547	3.98735	3.23884																	6.79166		7.1052	3.9854	3.23474				6.85344		7.10404	3.9844	3.23377			6.84808		7.10258	3.98321	3.23294
	81	23.3516	6.94944		7.07558	3.97973	3.23729			7.08658	3.98241	3.2275																	6.91653		7.08947	3.98275	3.22857				6.93779		7.09298	3.98244	3.22939			6.99012		7.08503	3.9799	3.22592
	82	23.5547	7.18837		7.0619	3.97215	3.22584			7.06435	3.97737	3.21819																	7.12684		7.06873	3.97849	3.22008				7.15285		7.07014	3.97764	3.21999			7.18182		7.06652	3.97561	3.21814
	83	23.7578	7.46172		7.05039	3.96834	3.21691			7.04762	3.97085	3.20992																	7.43185		7.0489	3.97164	3.21065				7.43748		7.04981	3.97083	3.21043			7.42779		7.04986	3.96969	3.21017
	84	23.9609	7.72147		7.03753	3.9626	3.20838			7.03704	3.96207	3.20251																	7.70622		7.03755	3.96278	3.20296				7.78389		7.03454	3.95868	3.19997			7.68287		7.03822	3.96155	3.20273
	85	24.1641	7.99731		7.02925	3.94316	3.19887			7.0282	3.94702	3.1927																	7.99585		7.02834	3.94729	3.19284				7.94472		7.02912	3.95003	3.19423			7.96062		7.02875	3.94764	3.19327
	86	24.3672	8.24342		7.02343	3.93185	3.19055			7.02012	3.92514	3.17995																	8.37363		7.01533	3.90936	3.17104				8.37282		7.01425	3.90947	3.17064			8.19884		7.02099	3.92841	3.18185
	87	24.5703	8.44749		7.01288	3.90564	3.15904			7.01202	3.89829	3.16486																	8.44082		7.01249	3.89964	3.16561				8.32727		7.01605	3.91539	3.17397			8.35903		7.01508	3.90997	3.17138
	88	24.7734	8.63221		7.00439	3.8644	3.13819			7.00294	3.86563	3.14676																	8.50204		7.00972	3.88985	3.16017				8.64444		7.00154	3.86425	3.14555			8.58937		7.00469	3.87357	3.15111
	89	24.9766	8.81593		6.98769	3.81547	3.1128			6.99208	3.82499	3.12437																	8.85167		6.98998	3.81669	3.11981				8.86134		6.98866	3.81551	3.11876			8.83908		6.99031	3.81979	3.12146
	90	25.1797	8.99269		6.98065	3.78593	3.09655			6.98015	3.77948	3.09937																	9.05767		6.97572	3.7622	3.08989				8.92047		6.98477	3.80053	3.11055			9.08484		6.97351	3.75524	3.08603
	91	25.3828	9.17125		6.97047	3.75087	3.06523			6.9673	3.73004	3.07224																	9.11661		6.97146	3.74581	3.0809				9.20824		6.96457	3.72193	3.06753			9.18054		6.96665	3.72866	3.07145
	92	25.5859	9.31934		6.95846	3.70169	3.0529			6.95674	3.68917	3.04983																	9.33999		6.95547	3.6841	3.04707				9.30078		6.95806	3.69641	3.05358			9.28679		6.95911	3.69932	3.05537
	93	25.7891	9.4531		6.9476	3.66034	3.02044			6.94777	3.65439	3.03077																	9.47771		6.94635	3.64875	3.0277				9.4886		6.94567	3.6477	3.02695			9.4157		6.95034	3.66513	3.03663
	94	25.9922	9.58		6.94012	3.62112	3.00568			6.94007	3.62449	3.01438																	9.5401		6.94252	3.63391	3.01957				9.59022		6.93967	3.62407	3.01404			9.602		6.93899	3.6208	3.01236
	95	26.1953	9.70462		6.93361	3.60806	2.99985			6.93344	3.59873	3.00027																	9.65668		6.93599	3.60854	3.00567				9.67374		6.93519	3.60642	3.0044			9.70834		6.93342	3.599	3.00042
	96	26.3984	9.78309		6.9306	3.58509	2.996			6.92978	3.58447	2.99246																	9.82882		6.9279	3.57713	2.98846				9.82601		6.92815	3.57864	2.98922			9.80779		6.92885	3.58112	2.99063
	97	26.6016	9.90832		6.92519	3.56235	2.98516			6.92473	3.56482	2.98169																	9.87426		6.92608	3.57004	2.98458				9.94951		6.92348	3.56022	2.97917			9.87812		6.92599	3.56993	2.9845
	98	26.8047	10.0091		6.92176	3.55343	2.97695			6.92134	3.55162	2.97447																	10.0249		6.92091	3.54995	2.97358				10.0156		6.92135	3.55178	2.97455			9.99966		6.92174	3.55329	2.97539
	99	27.0078	10.0978		6.91928	3.53939	2.97033			6.91881	3.54177	2.96907																	10.1352		6.91789	3.53823	2.96716				10.1093		6.91871	3.54137	2.96887			10.1403		6.91782	3.53791	2.96697
	100	27.2109	10.1874		6.91629	3.53279	2.96333			6.91664	3.53332	2.96444																	10.1842		6.91674	3.53373	2.96469				10.1581		6.91751	3.53661	2.96627			10.1707		6.91709	3.53507	2.96542
	101	27.4141	10.274		6.91416	3.52663	2.95966			6.91487	3.52641	2.96066																	10.2461		6.91543	3.52863	2.9619				10.3193		6.91424	3.52369	2.95921			10.2524		6.91535	3.52822	2.96167
	102	27.6172	10.3622		6.91272	3.52058	2.95905			6.91335	3.5205	2.95742																	10.3972		6.91283	3.51852	2.95636				10.3386		6.91391	3.5224	2.95851			10.3461		6.91366	3.52159	2.95804
	103	27.8203	10.4342		6.91185	3.51534	2.9566			6.91229	3.51639	2.95517																	10.4076		6.91267	3.51793	2.95604				10.4779		6.9119	3.51446	2.95417			10.4256		6.91245	3.51687	2.95546
	104	28.0234	10.5089		6.9115	3.51281	2.95459			6.91136	3.51274	2.95317																	10.5604		6.91079	3.5106	2.95202				10.4789		6.91189	3.51441	2.95415			10.5127		6.91134	3.51252	2.95307
	105	28.2266	10.5817		6.91014	3.50903	2.95191			6.91057	3.50969	2.9515																	10.618		6.91022	3.50839	2.95081				10.569		6.91087	3.51038	2.95195			10.624		6.91019	3.508	2.9506
	106	28.4297	10.6939		6.90881	3.50635	2.95062			6.90958	3.50583	2.94938																	10.6695		6.90977	3.50664	2.94985				10.6849		6.90981	3.50621	2.94967			10.719		6.9094	3.50491	2.94891
	107	28.6328	10.7118		6.90879	3.50378	2.95033			6.90945	3.50529	2.94909																	10.6895		6.90961	3.50601	2.94951				10.7137		6.90959	3.50533	2.94919			10.7259		6.90935	3.50471	2.9488
	108	28.8359	10.7281		6.90876	3.50295	2.94942			6.90933	3.50483	2.94884																	10.7689		6.90903	3.50376	2.94828				10.7596		6.90926	3.50403	2.94848			10.6737		6.90976	3.50631	2.94967
	109	29.0391	10.8165		6.90853	3.50219	2.94879			6.90874	3.50256	2.94759																	10.7905		6.90889	3.50321	2.94798				10.833		6.9088	3.5022	2.94748			10.7691		6.90905	3.50352	2.94815
	110	29.2422	10.864		6.90793	3.50067	2.94742			6.90847	3.50151	2.94702																	10.8707		6.90842	3.5014	2.94698				10.8718		6.90858	3.50135	2.94702			10.9222		6.90818	3.50011	2.94628
	111	29.4453	10.8959		6.90776	3.50038	2.94748			6.90831	3.50086	2.94667																	10.9252		6.90815	3.50033	2.9464				10.8839		6.90852	3.5011	2.94688			10.9365		6.90811	3.49985	2.94614
	112	29.6484	10.9321		6.9081	3.4998	2.94727			6.90813	3.50019	2.94629																	10.914		6.9082	3.50054	2.94652				10.949		6.90821	3.49986	2.9462			10.9937		6.90786	3.49887	2.9456
	113	29.8516	10.9672		6.90977	3.49958	2.94733			6.90798	3.49958	2.94596																	10.9442		6.90806	3.49999	2.94622				10.9348		6.90827	3.50011	2.94634			10.9099		6.90824	3.50034	2.94641
	114	30.0547	11.0132		6.9075	3.49782	2.94242			6.90779	3.49885	2.94556																	11.0311		6.90771	3.4986	2.94546				10.9644		6.90814	3.49959	2.94605			10.999		6.90784	3.49879	2.94556
	115	30.2578	11.0317		6.90693	3.49746	2.94585			6.90772	3.49858	2.94541																	11.0567		6.90761	3.49824	2.94526				10.9971		6.908	3.49905	2.94576			11.0506		6.90764	3.49802	2.94514
	116	30.4609	11.0524		6.90819	3.49811	2.94664			6.90765	3.49829	2.94525																	11.0115		6.90778	3.49889	2.94561				11.0979		6.90764	3.49762	2.94498			11.1045		6.90746	3.49731	2.94475
	117	30.6641	11.0811		6.90949	3.49796	2.9464			6.90755	3.4979	2.94505																	11.0648		6.90759	3.49813	2.9452				11.0244		6.9079	3.49863	2.94553			11.0676		6.90759	3.49779	2.94501
	118	30.8672	11.1122		6.90516	3.48437	2.94448			6.90745	3.49752	2.94483																	11.1596		6.90729	3.49699	2.94457				11.1714		6.90742	3.49676	2.94451			11.0428		6.90767	3.49813	2.9452
	119	31.0703	11.1235		6.90789	3.4967	2.94641			6.90742	3.49738	2.94476																	11.12		6.90741	3.49744	2.94482				11.1003		6.90763	3.49759	2.94496			11.0708		6.90757	3.49774	2.94499
	120	31.2734	11.137		6.90828	3.49734	2.94662			6.90738	3.49723	2.94467																	11.147		6.90733	3.49713	2.94465				11.0671		6.90774	3.49802	2.9452			11.1664		6.90728	3.49659	2.94435

## Sheet: pH Mnova
DSS reference shift/ppm:	0
Cutoff chemical shift for pH measurement/ppm:	0.005
Uncertainty in chemical shift/ppm:	0.005							pKa,0:		1.35		2.38		3.75		4.76		6.75		7.99		9.78		10.66
								dH/ppm:		6.3118		1.5106		8.2669		2.083		2.7074		1.2819		3.5494		2.5942
								dL/ppm:		6.048		1.2819		8.4414		1.906		2.4563		1.0711		3.1754		2.2901
								dH-dL /ppm		0.2638		0.2287		-0.1745		0.177		0.2511		0.2108		0.374		0.3041
								Dz2		-1		-1		-1		-1		1		-3		-1		1
Max ionic strength from buffers/mM:	115.734			These rows lie on the edges of the NMR-active region of the sample and are excluded from analysis
Min ionic strength from buffers/mM:	86.1246
Ionic strength from indicators and analyte/mM:	20
No rows:	128
zrange/mm	26						Paste table from Mnova in cell H20
Centre of image from tube base/mm:	20						Raw chemical shift data																			Paste table of analyte resonances from Mnova in cell AA20
								REFERENCE		INDICATORS																	ANALYTE 1		ANALYTE 2		ANALYTE 3				Referenced chemical shifts
Row on CSI image	Height from tube base/mm	I/M	pH	Uncertainty in pH				DSS		DCA		MPAH		Formate		Acetate		2,6-lutidine		MPA		Glycine		Methylamine			Imidazole upfield		Alpha		Beta downfield				Correction based on DSS	DCA	MPAH	Formate	Acetate	2,6-lutidine	MPA	Glycine	Methylamine		Imidazole upfield	Alpha	Beta downfield
							ARR_DATA(I)	MaxPeakPos(0.110,-0.152)		MaxPeakPos(6.332,5.867)		MaxPeakPos(1.638,0.597)		MaxPeakPos(8.678,8.101)		MaxPeakPos(2.164,1.728)		MaxPeakPos(2.957,2.234)		MaxPeakPos(1.776,0.558)		MaxPeakPos(4.030,2.894)		MaxPeakPos(2.962,2.231)		ARR_DATA(I)	MaxPeakPos(7.547,6.099)		MaxPeakPos(4.306,3.373)		MaxPeakPos(3.481,2.766)
1	7.10156	0.120929					0	0.008587	0	6.05697	0	1.0642	0	8.53831	0	1.91298	0	0	0	1.0642	0		0	0	0	0	7.28494	0	3.96911	0	3.31395	0			-0.008587	6.04839	1.05562	8.52972	1.9044	-0.008587	1.05562		-0.008587	-0.008587	7.27635	3.96052	3.30536
2	7.30469	0.120929					0	0.010185	0	6.05304	0	1.07891	0	8.46489	0	1.91349	0	0	0	1.07891	0		0	0	0	0	7.49777	0	4.2705	0	3.38798	0			-0.010185	6.04286	1.06873	8.45471	1.90331	-0.010185	1.06873		-0.010185	-0.010185	7.48759	4.26032	3.3778
3	7.50781	0.120929	8.28436	0.0942607			0	0.175513	0	6.01406	0	1.28497	0	8.22591	0	2.09225	0	0	0	1.28497	0		0	0	0	0	7.41281	0	3.96636	0	3.33578	0			-0.175513	5.83855	1.10945	8.0504	1.91673	-0.175513	1.10945		-0.175513	-0.175513	7.2373	3.79085	3.16027
4	7.71094	0.120929	1.70208	0.0445976			0	0.06554	0	6.25833	0	1.45083	0	8.25639	0	2.09637	0	0	0	1.45083	0		0	0	0	0	7.10017	0	4.15863	0	3.36683	0			-0.06554	6.19279	1.38529	8.19085	2.03083	-0.06554	1.38529		-0.06554	-0.06554	7.03463	4.09309	3.30129
5	7.91406	0.120929	1.48292	0.0552444			0	0.013861	0	6.2691	0	1.42698	0	8.20278	0	2.09645	0	0	0	1.42698	0		0	0	0	0	7.39208	0	4.04429	0	3.37605	0			-0.013861	6.25524	1.41311	8.18892	2.08259	-0.013861	1.41311		-0.013861	-0.013861	7.37822	4.03043	3.36219
6	8.11719	0.120929	2.23878	0.0474085			0	0.006734	0	5.94451	0	1.40584	0	8.24804	0	2.09321	0	2.71484	0	1.40584	0		0	0	0	0	7.38526	0	4.14293	0	3.37821	0			-0.006734	5.93778	1.39911	8.24131	2.08648	2.70811	1.39911		-0.006734	-0.006734	7.37853	4.1362	3.37148
7	8.32031	0.120929	1.69547	0.0441458			0	0.004534	0	6.18536	0	1.40359	0	8.13327	0	2.09105	0	2.71315	0	1.40359	0		0	0	0	0	6.95419	0	4.16554	0	3.38807	0			-0.004534	6.18083	1.39906	8.12874	2.08652	2.70862	1.39906		-0.004534	-0.004534	6.94966	4.16101	3.38354
8	8.52344	0.120929	2.10239	0.0491601			0	0.002195	0	6.31262	0	1.41903	0	8.26878	0	2.08834	0	2.70906	0	1.41903	0		0	0	0	0	7.3978	0	4.15404	0	3.38022	0			-0.002195	6.31043	1.41684	8.26658	2.08614	2.70687	1.41684		-0.002195	-0.002195	7.3956	4.15184	3.37803
9	8.72656	0.120929	2.20575	0.0678037			0	-0.000569	0	6.07661	0	1.3987	0	8.24024	0	2.08389	0	2.70493	0	1.3987	0		0	2.59018	0	0	7.38699	0	4.15762	0	3.38048	0			0.000569	6.07718	1.39927	8.24081	2.08446	2.7055	1.39927		2.59075	0.000569	7.38756	4.15819	3.38105
10	8.92969	0.120929	2.10775	0.0675662			0	-0.000798	0	6.07879	0	1.41466	0	8.24092	0	2.08416	0	2.70526	0	1.41466	0		0	0	0	0	7.39714	0	4.15902	0	3.38121	0			0.000798	6.07959	1.41545	8.24172	2.08496	2.70606	1.41545		0.000798	0.000798	7.39794	4.15982	3.38201
11	9.13281	0.120929	2.1251	0.0688802			0	-0.000835	0	6.0766	0	1.41349	0	8.23774	0	2.08339	0	2.70388	0	1.41349	0		0	2.59532	0	0	7.3994	0	4.15795	0	3.3811	0			0.000835	6.07743	1.41432	8.23857	2.08422	2.70471	1.41432		2.59615	0.000835	7.40024	4.15878	3.38193
12	9.33594	0.120929	2.15061	0.0718745			0	-0.000924	0	6.07235	0	1.41261	0	8.23359	0	2.08238	0	2.70223	0	1.41261	0		0	2.58778	0	0	7.39846	0	4.15612	0	3.38065	0			0.000924	6.07327	1.41353	8.23452	2.0833	2.70315	1.41353		2.5887	0.000924	7.39938	4.15704	3.38157
13	9.53906	0.120929	2.1388	0.0700625			0	-9.6e-05	0	6.07554	0	1.41341	0	8.23721	0	2.08361	0	2.70468	0	1.41341	0		0	2.60254	0	0	7.39799	0	4.1551	0	3.37994	0			9.6e-05	6.07563	1.41351	8.23731	2.08371	2.70478	1.41351		2.60264	9.6e-05	7.39809	4.1552	3.38004
14	9.74219	0.120929	2.13885	0.0696689			0	0.000117	0	6.0762	0	1.41318	0	8.23796	0	2.08386	0	2.70518	0	1.41318	0		0	2.60249	0	0	7.4	0	4.15551	0	3.38056	0			-0.000117	6.07608	1.41306	8.23784	2.08374	2.70506	1.41306		2.60237	-0.000117	7.39988	4.15539	3.38044
15	9.94531	0.120929	2.14714	0.0703585			0	0.000219	0	6.07527	0	1.41274	0	8.23682	0	2.08371	0	2.70477	0	1.41274	0		0	2.60235	0	0	7.39949	0	4.15482	0	3.38003	0			-0.000219	6.07505	1.41252	8.2366	2.0835	2.70455	1.41252		2.60213	-0.000219	7.39927	4.1546	3.37981
16	10.1484	0.120929	2.1482	0.0702612			0	0.001065	0	6.0762	0	1.41331	0	8.23809	0	2.08475	0	2.70608	0	1.41331	0		0	2.60356	0	0	7.39887	0	4.15368	0	3.37962	0			-0.001065	6.07513	1.41224	8.23702	2.08368	2.70501	1.41224		2.60249	-0.001065	7.3978	4.15261	3.37855
17	10.3516	0.120929	2.15372	0.070452			0	0.00189	0	6.07665	0	1.41346	0	8.23882	0	2.08543	0	2.70636	0	1.41346	0		0	2.60358	0	0	7.39876	0	4.15274	0	3.37941	0			-0.00189	6.07476	1.41157	8.23693	2.08354	2.70447	1.41157		2.60169	-0.00189	7.39687	4.15085	3.37752
18	10.5547	0.120929	2.15169	0.0697518			0	0.002576	0	6.0782	0	1.41369	0	8.24111	0	2.08633	0	2.70826	0	1.41369	0		0	2.60422	0	0	7.39656	0	4.15147	0	3.37828	0			-0.002576	6.07562	1.41111	8.23854	2.08375	2.70568	1.41111		2.60164	-0.002576	7.39398	4.14889	3.3757
19	10.7578	0.120929	2.16325	0.070772			0	0.003929	0	6.07808	0	1.41433	0	8.24044	0	2.08731	0	2.70904	0	1.41433	0		0	2.60145	0	0	7.39632	0	4.15063	0	3.3779	0			-0.003929	6.07415	1.4104	8.23651	2.08338	2.70511	1.4104		2.59752	-0.003929	7.39239	4.1467	3.37397
20	10.9609	0.120929	2.17148	0.0711389			0	0.004309	0	6.07784	0	1.41378	0	8.24072	0	2.08729	0	2.70893	0	1.41378	0	3.77863	0	2.60455	0	0	7.39625	0	4.14942	0	3.37772	0			-0.004309	6.07353	1.40947	8.23641	2.08298	2.70462	1.40947	3.77432	2.60024	-0.004309	7.39194	4.14511	3.37341
21	11.1641	0.120929	2.16983	0.0704597			0	0.004586	0	6.07894	0	1.41357	0	8.24361	0	2.08797	0	2.71005	0	1.41357	0	3.77916	0	2.60533	0	0	7.39808	0	4.14976	0	3.37828	0			-0.004586	6.07435	1.40899	8.23902	2.08339	2.70546	1.40899	3.77458	2.60074	-0.004586	7.39349	4.14517	3.37369
22	11.3672	0.120929	2.18716	0.0714937			0	0.007001	0	6.0798	0	1.4143	0	8.24453	0	2.08945	0	2.71111	0	1.4143	0	3.77936	0	2.60525	0	0	7.39834	0	4.14891	0	3.37789	0			-0.007001	6.0728	1.4073	8.23753	2.08245	2.70411	1.4073	3.77236	2.59825	-0.007001	7.39134	4.14191	3.37089
23	11.5703	0.120929	2.17955	0.0709035			0	0.004831	0	6.07846	0	1.41273	0	8.24409	0	2.08843	0	2.71014	0	1.41273	0	3.77702	0	2.60016	0	0	7.39701	0	4.14688	0	3.37723	0			-0.004831	6.07362	1.4079	8.23926	2.0836	2.70531	1.4079	3.77219	2.59533	-0.004831	7.39218	4.14205	3.3724
24	11.7734	0.120929	2.19027	0.0716029			0	0.006499	0	6.07911	0	1.41341	0	8.24309	0	2.08977	0	2.71138	0	1.41341	0	3.77672	0	2.6022	0	0	7.39754	0	4.14637	0	3.37713	0			-0.006499	6.07261	1.40691	8.23659	2.08327	2.70488	1.40691	3.77022	2.5957	-0.006499	7.39104	4.13987	3.37063
25	11.9766	0.120929	2.18327	0.0701621			0	0.0064	0	6.08082	0	1.41283	0	8.24502	0	2.09044	0	2.71221	0	1.41283	0	3.77673	0	2.60524	0	0	7.397	0	4.14594	0	3.37656	0			-0.0064	6.07442	1.40643	8.23862	2.08404	2.70581	1.40643	3.77033	2.59884	-0.0064	7.3906	4.13954	3.37016
26	12.1797	0.120929	2.20406	0.0722765			0	0.006156	0	6.07776	0	1.41151	0	8.24283	0	2.08962	0	2.7102	0	1.41151	0	3.77421	0	2.60095	0	0	7.39793	0	4.14491	0	3.37721	0			-0.006156	6.07161	1.40535	8.23667	2.08347	2.70404	1.40535	3.76806	2.59479	-0.006156	7.39177	4.13875	3.37105
27	12.3828	0.120929	2.21821	0.0728021			0	0.008406	0	6.07922	0	1.41195	0	8.24542	0	2.09068	0	2.71223	0	1.41195	0	3.77461	0	2.60774	0	0	7.39591	0	4.14176	0	3.37544	0			-0.008406	6.07081	1.40355	8.23701	2.08227	2.70382	1.40355	3.7662	2.59933	-0.008406	7.3875	4.13335	3.36703
28	12.5859	0.120929	2.21217	0.0713046			0	0.007813	0	6.08043	0	1.41072	0	8.2474	0	2.09081	0	2.71277	0	1.41072	0	3.77353	0	2.60453	0	0	7.39606	0	4.1398	0	3.37468	0			-0.007813	6.07261	1.40291	8.23958	2.08299	2.70496	1.40291	3.76571	2.59672	-0.007813	7.38825	4.13199	3.36687
29	12.7891	0.120929	2.22809	0.0728432			0	0.008632	0	6.07928	0	1.41056	0	8.24619	0	2.09145	0	2.71304	0	1.41056	0	3.77198	0	2.60458	0	0	7.39426	0	4.13768	0	3.37422	0			-0.008632	6.07065	1.40193	8.23756	2.08281	2.70441	1.40193	3.76335	2.59595	-0.008632	7.38563	4.12905	3.36559
30	12.9922	0.120929	2.22913	0.072683			0	0.008224	0	6.07905	0	1.4098	0	8.24751	0	2.0918	0	2.71365	0	1.4098	0	3.77127	0	2.60434	0	0	7.39679	0	4.13702	0	3.37521	0			-0.008224	6.07082	1.40158	8.23929	2.08358	2.70543	1.40158	3.76304	2.59612	-0.008224	7.38857	4.1288	3.36699
31	13.1953	0.120929	2.24747	0.0737519			0	0.008796	0	6.07827	0	1.40838	0	8.24651	0	2.09174	0	2.71305	0	1.40838	0	3.76891	0	2.6036	0	0	7.39646	0	4.1361	0	3.37409	0			-0.008796	6.06947	1.39958	8.23771	2.08295	2.70425	1.39958	3.76011	2.5948	-0.008796	7.38766	4.1273	3.36529
32	13.3984	0.120929	2.23528	0.0711963			0	0.008866	0	6.08141	0	1.40762	0	8.25017	0	2.09247	0	2.714	0	1.40762	0	3.76861	0	2.60957	0	0	7.39486	0	4.13365	0	3.37271	0			-0.008866	6.07255	1.39875	8.2413	2.0836	2.70513	1.39875	3.75974	2.6007	-0.008866	7.38599	4.12478	3.36384
33	13.6016	0.120929	2.24471	0.071778			0	0.009303	0	6.0811	0	1.40711	0	8.25118	0	2.09344	0	2.71518	0	1.40711	0	3.76789	0	2.60673	0	0	7.39463	0	4.13178	0	3.3726	0			-0.009303	6.07179	1.39781	8.24187	2.08413	2.70588	1.39781	3.75859	2.59743	-0.009303	7.38533	4.12248	3.3633
34	13.8047	0.120929	2.26111	0.0730388			0	0.008236	0	6.07848	0	1.40465	0	8.24802	0	2.092	0	2.71363	0	1.40465	0	3.76331	0	2.60265	0	0	7.39362	0	4.12828	0	3.37137	0			-0.008236	6.07025	1.39641	8.23978	2.08376	2.70539	1.39641	3.75507	2.59441	-0.008236	7.38538	4.12004	3.36313
35	14.0078	0.120929	2.276	0.0737115			0	0.010075	0	6.07955	0	1.4046	0	8.24973	0	2.09319	0	2.71485	0	1.4046	0	3.76275	0	2.60595	0	0	7.3957	0	4.12656	0	3.37161	0			-0.010075	6.06947	1.39453	8.23966	2.08312	2.70478	1.39453	3.75267	2.59587	-0.010075	7.38563	4.11648	3.36153
36	14.2109	0.120929	2.2868	0.0743462			0	0.010181	0	6.07896	0	1.40349	0	8.25092	0	2.09363	0	2.7155	0	1.40349	0	3.76157	0	2.60632	0	0	7.39543	0	4.12521	0	3.37126	0			-0.010181	6.06877	1.39331	8.24073	2.08345	2.70532	1.39331	3.75139	2.59614	-0.010181	7.38525	4.11503	3.36108
37	14.4141	0.120929	2.30856	0.0763648			0	0.00928	0	6.07591	0	1.40085	0	8.24909	0	2.09258	0	2.71418	0	1.40085	0	3.75722	0	2.6039	0	0	7.39412	0	4.12292	0	3.3702	0			-0.00928	6.06663	1.39157	8.23981	2.0833	2.7049	1.39157	3.74794	2.59462	-0.00928	7.38484	4.11364	3.36092
38	14.6172	0.120929	2.31072	0.0754906			0	0.009944	0	6.07759	0	1.40018	0	8.2515	0	2.09337	0	2.71564	0	1.40018	0	3.7556	0	2.60661	0	0	7.39409	0	4.12145	0	3.36949	0			-0.009944	6.06764	1.39024	8.24156	2.08343	2.7057	1.39024	3.74566	2.59667	-0.009944	7.38415	4.11151	3.35955
39	14.8203	0.120929	2.33518	0.0776856			0	0.010193	0	6.07569	0	1.39829	0	8.25063	0	2.093	0	2.71494	0	1.39829	0	3.75292	0	2.60474	0	0	7.39413	0	4.11927	0	3.369	0			-0.010193	6.06549	1.38809	8.24044	2.08281	2.70475	1.38809	3.74273	2.59455	-0.010193	7.38394	4.10908	3.35881
40	15.0234	0.120929	2.33817	0.0767396			0	0.009558	0	6.07617	0	1.39609	0	8.25205	0	2.09342	0	2.71537	0	1.39609	0	3.75018	0	2.60503	0	0	7.39273	0	4.11523	0	3.36786	0			-0.009558	6.06661	1.38653	8.24249	2.08386	2.70581	1.38653	3.74062	2.59547	-0.009558	7.38317	4.10567	3.3583
41	15.2266	0.120929	2.34688	0.0769201			0	0.010124	0	6.0767	0	1.39521	0	8.25213	0	2.09404	0	2.71612	0	1.39521	0	3.74772	0	2.60668	0	0	7.39296	0	4.11448	0	3.36749	0			-0.010124	6.06657	1.38508	8.24201	2.08392	2.706	1.38508	3.7376	2.59656	-0.010124	7.38284	4.10436	3.35737
42	15.4297	0.120929	2.38588	0.0803801			0	0.011115	0	6.07476	0	1.3925	0	8.25062	0	2.093	0	2.71504	0	1.3925	0	3.74344	0	2.60544	0	0	7.39358	0	4.11195	0	3.36639	0			-0.011115	6.06364	1.38138	8.23951	2.08188	2.70392	1.38138	3.73232	2.59432	-0.011115	7.38246	4.10084	3.35527
43	15.6328	0.120929	2.39258	0.0795969			0	0.011571	0	6.0763	0	1.39083	0	8.2533	0	2.09383	0	2.71604	0	1.39083	0	3.7413	0	2.60779	0	0	7.3915	0	4.10775	0	3.36505	0			-0.011571	6.06472	1.37926	8.24173	2.08226	2.70447	1.37926	3.72973	2.59622	-0.011571	7.37993	4.09618	3.35348
44	15.8359	0.120929	2.41358	0.0811845			0	0.011677	0	6.07534	0	1.38854	0	8.25352	0	2.09395	0	2.7159	0	1.38854	0	3.73693	0	2.60692	0	0	7.39048	0	4.10512	0	3.36493	0			-0.011677	6.06367	1.37687	8.24184	2.08228	2.70422	1.37687	3.72525	2.59524	-0.011677	7.3788	4.09344	3.35325
45	16.0391	0.120929	2.432	0.0828693			0	0.01118	0	6.07371	0	1.38618	0	8.25403	0	2.09395	0	2.71592	0	1.38618	0	3.73212	0	2.60582	0	0	7.38942	0	4.10217	0	3.36349	0			-0.01118	6.06253	1.375	8.24285	2.08277	2.70474	1.375	3.72094	2.59464	-0.01118	7.37824	4.09099	3.35231
46	16.2422	0.120929	2.4359	0.0820742			0	0.01067	0	6.07427	0	1.38401	0	8.25802	0	2.09433	0	2.71671	0	1.38401	0	3.72892	0	2.6075	0	0	7.39013	0	4.10069	0	3.36316	0			-0.01067	6.0636	1.37334	8.24735	2.08366	2.70604	1.37334	3.71825	2.59683	-0.01067	7.37946	4.09002	3.35249
47	16.4453	0.120929	2.468	0.084941			0	0.010988	0	6.07294	0	1.3809	0	8.25714	0	2.09381	0	2.71604	0	1.3809	0	3.72367	0	2.60646	0	0	7.39002	0	4.09595	0	3.36211	0			-0.010988	6.06196	1.36991	8.24615	2.08282	2.70505	1.36991	3.71268	2.59547	-0.010988	7.37903	4.08496	3.35112
48	16.6484	0.120929	2.49085	0.0864376			0	0.011241	0	6.07284	0	1.37799	0	8.25764	0	2.0938	0	2.71587	0	1.37799	0	3.72037	0	2.60539	0	0	7.38905	0	4.09232	0	3.36086	0			-0.011241	6.0616	1.36675	8.2464	2.08255	2.70463	1.36675	3.70913	2.59415	-0.011241	7.37781	4.08108	3.34962
49	16.8516	0.120929	2.50108	0.0864622			0	0.01113	0	6.07338	0	1.37565	0	8.25952	0	2.09409	0	2.71655	0	1.37565	0	3.71681	0	2.60602	0	0	7.39076	0	4.09087	0	3.36102	0			-0.01113	6.06225	1.36452	8.24839	2.08296	2.70542	1.36452	3.70568	2.59489	-0.01113	7.37963	4.07974	3.34989
50	17.0547	0.120929	2.52869	0.0892484			0	0.009879	0	6.07089	0	1.37153	0	8.258	0	2.09281	0	2.71538	0	1.37153	0	3.71068	0	2.60289	0	0	7.39015	0	4.08945	0	3.36014	0			-0.009879	6.06101	1.36165	8.24812	2.08293	2.7055	1.36165	3.7008	2.59301	-0.009879	7.38027	4.07957	3.35026
51	17.2578	0.120929	2.564	0.093336			0	0.010875	0	6.07015	0	1.36914	0	8.25904	0	2.09376	0	2.71622	0	1.36914	0	3.70498	0	2.60566	0	0	7.38854	0	4.08296	0	3.35819	0			-0.010875	6.05927	1.35826	8.24816	2.08289	2.70534	1.35826	3.69411	2.59478	-0.010875	7.37766	4.07208	3.34732
52	17.4609	0.120929	2.58739	0.0951947			0	0.011379	0	6.07066	0	1.36634	0	8.26043	0	2.09428	0	2.71653	0	1.36634	0	3.69991	0	2.60577	0	0	7.38688	0	4.07969	0	3.35697	0			-0.011379	6.05929	1.35496	8.24905	2.0829	2.70515	1.35496	3.68853	2.59439	-0.011379	7.3755	4.06831	3.34559
53	17.6641	0.120929	2.61226	0.0974219			0	0.011186	0	6.07045	0	1.36272	0	8.26149	0	2.09365	0	2.71624	0	1.36272	0	3.69349	0	2.6063	0	0	7.3861	0	4.0767	0	3.35596	0			-0.011186	6.05927	1.35154	8.2503	2.08246	2.70505	1.35154	3.68231	2.59511	-0.011186	7.37491	4.06551	3.34477
54	17.8672	0.120929	2.65142	0.102379			0	0.01176	0	6.06986	0	1.35929	0	8.26364	0	2.09353	0	2.71675	0	1.35929	0	3.68707	0	2.60764	0	0	7.38638	0	4.07359	0	3.35499	0			-0.01176	6.0581	1.34753	8.25188	2.08176	2.70499	1.34753	3.6753	2.59588	-0.01176	7.37462	4.06183	3.34323
55	18.0703	0.120929	2.70251	0.109988			0	0.012586	0	6.06893	0	1.35545	0	8.26433	0	2.09319	0	2.71673	0	1.35545	0	3.68132	0	2.60664	0	0	7.38468	0	4.06978	0	3.35348	0			-0.012586	6.05635	1.34287	8.25174	2.08061	2.70414	1.34287	3.66873	2.59405	-0.012586	7.37209	4.05719	3.34089
56	18.2734	0.120929	2.71614	0.110456			0	0.011591	0	6.06937	0	1.35126	0	8.26814	0	2.09292	0	2.71655	0	1.35126	0	3.67473	0	2.60598	0	0	7.38419	0	4.06751	0	3.35197	0			-0.011591	6.05778	1.33967	8.25655	2.08133	2.70496	1.33967	3.66314	2.59439	-0.011591	7.3726	4.05592	3.34038
57	18.4766	0.120929	2.75334	0.11662			0	0.011615	0	6.0683	0	1.34809	0	8.2701	0	2.09328	0	2.71704	0	1.34809	0	3.66784	0	2.60719	0	0	7.38549	0	4.06492	0	3.35212	0			-0.011615	6.05668	1.33647	8.25848	2.08167	2.70542	1.33647	3.65622	2.59558	-0.011615	7.37387	4.0533	3.34051
58	18.6797	0.120929	2.79437	0.124084			0	0.011437	0	6.06702	0	1.34449	0	8.27254	0	2.09295	0	2.71706	0	1.34449	0	3.66065	0	2.60687	0	0	7.38393	0	4.06095	0	3.35086	0			-0.011437	6.05558	1.33306	8.2611	2.08152	2.70562	1.33306	3.64921	2.59543	-0.011437	7.37249	4.04951	3.33942
59	18.8828	0.120929	2.85379	0.136086			0	0.012565	0	6.06692	0	1.34072	0	8.27618	0	2.09324	0	2.71736	0	1.34072	0	3.65347	0	2.6026	0	0	7.38213	0	4.057	0	3.34953	0			-0.012565	6.05436	1.32816	8.26362	2.08068	2.7048	1.32816	3.6409	2.59003	-0.012565	7.36956	4.04444	3.33697
60	19.0859	0.120929	2.88795	0.142939			0	0.012614	0	6.06722	0	1.33715	0	8.28064	0	2.09347	0	2.71813	0	1.33715	0	3.64867	0	2.6086	0	0	7.38342	0	4.05453	0	3.34901	0			-0.012614	6.0546	1.32454	8.26802	2.08085	2.70552	1.32454	3.63605	2.59599	-0.012614	7.37081	4.04192	3.3364
61	19.2891	0.120929	2.94754	0.158412			0	0.012128	0	6.06522	0	1.3329	0	8.28355	0	2.09188	0	2.71731	0	1.3329	0	3.63861	0	2.60581	0	0	7.38267	0	4.0511	0	3.34793	0			-0.012128	6.05309	1.32077	8.27142	2.07975	2.70518	1.32077	3.62648	2.59368	-0.012128	7.37054	4.03897	3.3358
62	19.4922	0.120929	2.8629	0.155161			0	0.013199	0	6.06719	0	1.32989	0	8.2889	0	2.09219	0	2.71844	0	1.32989	0	3.63286	0	2.60319	0	0	7.38079	0	4.04797	0	3.34676	0			-0.013199	6.05399	1.31669	8.27571	2.07899	2.70524	1.31669	3.61966	2.58999	-0.013199	7.36759	4.03477	3.33356
63	19.6953	0.120929	2.91769	0.138128			0	0.013317	0	6.06768	0	1.32635	0	8.29718	0	2.0918	0	2.71883	0	1.32635	0	3.62601	0	2.60742	0	0	7.38097	0	4.04607	0	3.34624	0			-0.013317	6.05436	1.31304	8.28386	2.07848	2.70551	1.31304	3.61269	2.5941	-0.013317	7.36765	4.03275	3.33292
64	19.8984	0.120929	2.9706	0.13281			0	0.013526	0	6.06571	0	1.32354	0	8.30225	0	2.09116	0	2.71903	0	1.32354	0	3.61937	0	2.60903	0	0	7.38104	0	4.04457	0	3.3461	0			-0.013526	6.05219	1.31002	8.28872	2.07763	2.7055	1.31002	3.60584	2.5955	-0.013526	7.36751	4.03104	3.33257
65	20.1016	0.120929	3.04238	0.124334			0	0.013175	0	6.06529	0	1.32033	0	8.30887	0	2.09045	0	2.71929	0	1.32033	0	3.61308	0	2.60407	0	0	7.37936	0	4.04111	0	3.34481	0			-0.013175	6.05211	1.30715	8.29569	2.07728	2.70612	1.30715	3.5999	2.5909	-0.013175	7.36618	4.02793	3.33163
66	20.3047	0.120929	3.11326	0.119647			0	0.013445	0	6.06412	0	1.31764	0	8.31545	0	2.08891	0	2.71859	0	1.31764	0	3.60656	0	2.60627	0	0	7.38032	0	4.04044	0	3.34492	0			-0.013445	6.05068	1.30419	8.302	2.07547	2.70514	1.30419	3.59311	2.59282	-0.013445	7.36688	4.027	3.33148
67	20.5078	0.120929	3.19287	0.114631			0	0.014297	0	6.06581	0	1.31576	0	8.32376	0	2.08855	0	2.71987	0	1.31576	0	3.60238	0	2.60916	0	0	7.37932	0	4.03845	0	3.3443	0			-0.014297	6.05151	1.30147	8.30947	2.07426	2.70557	1.30147	3.58808	2.59486	-0.014297	7.36502	4.02415	3.33
68	20.7109	0.120929	3.3061	0.106376			0	0.014327	0	6.06734	0	1.31364	0	8.3359	0	2.08758	0	2.72083	0	1.31364	0	3.59809	0	2.61037	0	0	7.37736	0	4.03505	0	3.34282	0			-0.014327	6.05301	1.29932	8.32157	2.07325	2.7065	1.29932	3.58377	2.59604	-0.014327	7.36303	4.02072	3.32849
69	20.9141	0.120929	3.35844	0.109829			0	0.015295	0	6.06447	0	1.3113	0	8.34038	0	2.08506	0	2.71994	0	1.3113	0	3.59312	0	2.60822	0	0	7.37757	0	4.03396	0	3.34228	0			-0.015295	6.04917	1.296	8.32508	2.06976	2.70464	1.296	3.57783	2.59293	-0.015295	7.36228	4.01867	3.32699
70	21.1172	0.120929	3.50366	0.102159			0	0.01484	0	6.06594	0	1.3098	0	8.35404	0	2.08368	0	2.72097	0	1.3098	0	3.59007	0	2.61053	0	0	7.37774	0	4.03314	0	3.34255	0			-0.01484	6.0511	1.29496	8.3392	2.06884	2.70613	1.29496	3.57523	2.59569	-0.01484	7.3629	4.0183	3.32771
71	21.3203	0.120929	3.59539	0.0957484			0	0.014975	0	6.0652	0	1.30846	0	8.36308	0	2.08099	0	2.72093	0	1.30846	0	3.58628	0	2.60963	0	0	7.37607	0	4.03144	0	3.34158	0			-0.014975	6.05022	1.29349	8.34811	2.06601	2.70595	1.29349	3.5713	2.59465	-0.014975	7.3611	4.01647	3.3266
72	21.5234	0.120929	3.68199	0.0918716			0	0.014444	0	6.06574	0	1.30676	0	8.37156	0	2.0778	0	2.72103	0	1.30676	0	3.58374	0	2.609	0	0	7.37767	0	4.0323	0	3.34223	0			-0.014444	6.05129	1.29232	8.35711	2.06336	2.70659	1.29232	3.56929	2.59456	-0.014444	7.36323	4.01786	3.32779
73	21.7266	0.120929	3.79088	0.0887186			0	0.015526	0	6.06663	0	1.30636	0	8.38377	0	2.07482	0	2.72192	0	1.30636	0	3.58162	0	2.6105	0	0	7.37692	0	4.03124	0	3.34184	0			-0.015526	6.0511	1.29084	8.36825	2.0593	2.70639	1.29084	3.5661	2.59497	-0.015526	7.36139	4.01571	3.32631
74	21.9297	0.120929	3.87111	0.0865657			0	0.015029	0	6.06551	0	1.30499	0	8.3906	0	2.07021	0	2.72116	0	1.30499	0	3.57864	0	2.60913	0	0	7.37446	0	4.02939	0	3.34071	0			-0.015029	6.05048	1.28996	8.37557	2.05518	2.70613	1.28996	3.56361	2.5941	-0.015029	7.35943	4.01436	3.32568
75	22.1328	0.120929	3.97499	0.0857818			0	0.015704	0	6.06603	0	1.30464	0	8.40104	0	2.06557	0	2.72187	0	1.30464	0	3.57734	0	2.61064	0	0	7.37313	0	4.02857	0	3.33989	0			-0.015704	6.05032	1.28894	8.38534	2.04987	2.70617	1.28894	3.56164	2.59494	-0.015704	7.35743	4.01287	3.32419
76	22.3359	0.120929	4.09159	0.0865534			0	0.016782	0	6.06743	0	1.30452	0	8.41263	0	2.06008	0	2.723	0	1.30452	0	3.57669	0	2.61341	0	0	7.37308	0	4.02816	0	3.3394	0			-0.016782	6.05064	1.28773	8.39584	2.0433	2.70622	1.28773	3.55991	2.59663	-0.016782	7.3563	4.01138	3.32262
77	22.5391	0.120929	4.17691	0.0829214			0	0.016918	0	6.06449	0	1.30314	0	8.41649	0	2.05139	0	2.72164	0	1.30314	0	3.57342	0	2.60942	0	0	7.37077	0	4.02618	0	3.33774	0			-0.016918	6.04757	1.28623	8.39957	2.03448	2.70472	1.28623	3.5565	2.5925	-0.016918	7.35385	4.00926	3.32082
78	22.7422	0.120929	4.30883	0.0860217			0	0.01733	0	6.06548	0	1.30295	0	8.42703	0	2.04261	0	2.72217	0	1.30295	0	3.57256	0	2.60997	0	0	7.37001	0	4.02562	0	3.33769	0			-0.01733	6.04815	1.28562	8.4097	2.02528	2.70484	1.28562	3.55523	2.59264	-0.01733	7.35268	4.00829	3.32036
79	22.9453	0.120929	4.43439	0.0895908			0	0.01748	0	6.06625	0	1.30266	0	8.43502	0	2.03242	0	2.72253	0	1.30266	0	3.57168	0	2.61153	0	0	7.36795	0	4.02542	0	3.33656	0			-0.01748	6.04877	1.28518	8.41754	2.01494	2.70505	1.28518	3.5542	2.59405	-0.01748	7.35047	4.00794	3.31908
80	23.1484	0.120929	4.61642	0.0997145			0	0.017418	0	6.06864	0	1.30244	0	8.4452	0	2.01688	0	2.72299	0	1.30244	0	3.57158	0	2.61171	0	0	7.36503	0	4.02477	0	3.33479	0			-0.017418	6.05123	1.28503	8.42779	1.99946	2.70557	1.28503	3.55416	2.59429	-0.017418	7.34761	4.00735	3.31737
81	23.3516	0.120929	4.74916	0.104998			0	0.017943	0	6.06723	0	1.30205	0	8.44833	0	2.00268	0	2.72211	0	1.30205	0	3.57052	0	2.61143	0	0	7.36088	0	4.023	0	3.33216	0			-0.017943	6.04929	1.28411	8.43039	1.98474	2.70417	1.28411	3.55258	2.59349	-0.017943	7.34294	4.00506	3.31422
82	23.5547	0.120929	4.98515	0.125871			0	0.017739	0	6.06621	0	1.30082	0	8.45049	0	1.97749	0	2.71996	0	1.30082	0	3.5689	0	2.61029	0	0	7.35582	0	4.02263	0	3.32991	0			-0.017739	6.04848	1.28308	8.43275	1.95975	2.70222	1.28308	3.55116	2.59255	-0.017739	7.33808	4.00489	3.31217
83	23.7578	0.120929	5.22601	0.155291			0	0.018722	0	6.06728	0	1.30089	0	8.45544	0	1.96344	0	2.71857	0	1.30089	0	3.56944	0	2.61144	0	0	7.34439	0	4.01913	0	3.32297	0			-0.018722	6.04856	1.28217	8.43672	1.94472	2.69985	1.28217	3.55072	2.59272	-0.018722	7.32567	4.00041	3.30425
84	23.9609	0.120929	5.50652	0.198151			0	0.018313	0	6.06821	0	1.29999	0	8.45852	0	1.94622	0	2.71459	0	1.29999	0	3.56969	0	2.61191	0	0	7.314	0	4.01423	0	3.3089	0			-0.018313	6.0499	1.28168	8.44021	1.92791	2.69628	1.28168	3.55137	2.5936	-0.018313	7.29569	3.99592	3.29059
85	24.1641	0.120929	5.81386	0.200802			0	0.017859	0	6.06538	0	1.29728	0	8.45635	0	1.93526	0	2.70468	0	1.29728	0	3.56789	0	2.61067	0	0	7.28622	0	4.01036	0	3.29617	0			-0.017859	6.04752	1.27942	8.43849	1.9174	2.68682	1.27942	3.55003	2.59281	-0.017859	7.26836	3.9925	3.27831
86	24.3672	0.120929	6.03284	0.169476			0	0.018477	0	6.06609	0	1.29503	0	8.45824	0	1.93162	0	2.6937	0	1.29503	0	3.56865	0	2.61148	0	0	7.22964	0	4.00385	0	3.27777	0			-0.018477	6.04761	1.27655	8.43976	1.91314	2.67522	1.27655	3.55017	2.593	-0.018477	7.21116	3.98537	3.25929
87	24.5703	0.120929	6.26	0.121705			0	0.018064	0	6.06737	0	1.29098	0	8.45952	0	1.92885	0	2.67633	0	1.29098	0	3.56871	0	2.61159	0	0	7.19162	0	3.99668	0	3.26419	0			-0.018064	6.04931	1.27291	8.44146	1.91079	2.65827	1.27291	3.55064	2.59353	-0.018064	7.17356	3.97862	3.24613
88	24.7734	0.120929	6.45452	0.0919672			0	0.017732	0	6.06873	0	1.28614	0	8.46125	0	1.92762	0	2.65573	0	1.28614	0	3.56926	0	2.61202	0	0	7.14663	0	3.99055	0	3.24684	0			-0.017732	6.051	1.26841	8.44352	1.90989	2.638	1.26841	3.55153	2.59429	-0.017732	7.1289	3.97282	3.22911
89	24.9766	0.120929	6.65356	0.163911			0	0.018341	0	6.06816	0	1.28017	0	8.46085	0	1.92714	0		0	1.28017	0	3.56914	0	2.61229	0	0	7.11969	0	3.98525	0	3.23825	0			-0.018341	6.04982	1.26183	8.4425	1.9088		1.26183	3.5508	2.59395	-0.018341	7.10135	3.96691	3.21991
90	25.1797	0.120929	6.85764	0.113863			0	0.018583	0	6.06545	0	1.27011	0	8.45741	0	1.92586	0		0	1.27011	0	3.56735	0	2.61077	0	0	7.0991	0	3.9797	0	3.22491	0			-0.018583	6.04686	1.25153	8.43883	1.90728		1.25153	3.54877	2.59219	-0.018583	7.08052	3.96112	3.20633
91	25.3828	0.120929	7.19484	0.0718884			0	0.018785	0	6.06699	0	1.24422	0	8.46012	0	1.92605	0		0	1.24422	0	3.56809	0	2.61142	0	0	7.0757	0	3.97706	0	3.21526	0			-0.018785	6.0482	1.22543	8.44134	1.90726		1.22543	3.5493	2.59264	-0.018785	7.05692	3.95827	3.19647
92	25.5859	0.120929	7.25823	0.0560367			0	0.018328	0	6.06868	0	1.22835	0	8.46245	0	1.92595	0	2.55667	0	1.22835	0	3.56808	0	2.61214	0	0	7.05988	0	3.97242	0	3.20843	0			-0.018328	6.05035	1.21002	8.44412	1.90762	2.53834	1.21002	3.54975	2.59381	-0.018328	7.04155	3.95409	3.1901
93	25.7891	0.120929	7.51644	0.0633209			0	0.01841	0	6.06672	0	1.20465	0	8.45931	0	1.92523	0	2.52494	0	1.20465	0	3.56599	0	2.61112	0	0	7.04782	0	3.96722	0	3.1992	0			-0.01841	6.04831	1.18624	8.4409	1.90682	2.50653	1.18624	3.54758	2.59271	-0.01841	7.02941	3.94881	3.18079
94	25.9922	0.120929	7.76418	0.0772006			0	0.019506	0	6.06471	0	1.17976	0	8.45582	0	1.92507	0	2.50446	0	1.17976	0	3.56351	0	2.61045	0	0	7.0373	0	3.96172	0	3.19273	0			-0.019506	6.04521	1.16025	8.43632	1.90556	2.48495	1.16025	3.544	2.59094	-0.019506	7.01779	3.94221	3.17322
95	26.1953	0.120929	7.9365	0.0924558			0	0.018471	0	6.06744	0	1.16039	0	8.45979	0	1.92533	0	2.49359	0	1.16039	0	3.56232	0	2.61106	0	0	7.03013	0	3.94611	0	3.18491	0			-0.018471	6.04897	1.14192	8.44132	1.90686	2.47512	1.14192	3.54385	2.59259	-0.018471	7.01166	3.92764	3.16644
96	26.3984	0.120929	8.23863	0.135973			0	0.017597	0	6.06867	0	1.12828	0	8.46202	0	1.9251	0	2.48616	0	1.12828	0	3.55884	0	2.61078	0	0	7.0236	0	3.93228	0	3.17386	0			-0.017597	6.05107	1.11068	8.44442	1.9075	2.46856	1.11068	3.54124	2.59318	-0.017597	7.006	3.91468	3.15626
97	26.6016	0.120929	8.39082	0.152148			0	0.018415	0	6.06752	0	1.1175	0	8.46016	0	1.92501	0	2.48121	0	1.1175	0	3.55217	0	2.6098	0	0	7.0144	0	3.9092	0	3.16366	0			-0.018415	6.0491	1.09909	8.44175	1.9066	2.46279	1.09909	3.53376	2.59138	-0.018415	6.99599	3.89078	3.14525
98	26.8047	0.120929	8.55738	0.117336			0	0.017917	0	6.06601	0	1.09228	0	8.45819	0	1.92415	0	2.47743	0	1.09228	0	3.53998	0	2.6078	0	0	7.00577	0	3.87487	0	3.1496	0			-0.017917	6.04809	1.07436	8.44028	1.90624	2.45951	1.07436	3.52206	2.58988	-0.017917	6.98785	3.85695	3.13168
99	27.0078	0.120929	8.74809	0.123945			0	0.018077	0	6.06712	0	1.10271	0	8.46025	0	1.92452	0	2.47644	0	1.10271	0	3.5281	0	2.60754	0	0	6.99673	0	3.83888	0	3.13222	0			-0.018077	6.04905	1.08463	8.44218	1.90644	2.45836	1.08463	3.51003	2.58946	-0.018077	6.97865	3.8208	3.11414
100	27.2109	0.120929	8.84706	0.115397			0	0.017718	0	6.06834	0	1.09889	0	8.46227	0	1.92471	0	2.47602	0	1.09889	0	3.51919	0	2.60664	0	0	6.98499	0	3.80419	0	3.10842	0			-0.017718	6.05062	1.08117	8.44455	1.90699	2.4583	1.08117	3.50147	2.58892	-0.017718	6.96727	3.78647	3.0907
101	27.4141	0.120929	9.0996	0.0841224			0	0.018071	0	6.06466	0	1.09613	0	8.45716	0	1.924	0	2.47419	0	1.09613	0	3.48981	0	2.60355	0	0	6.97421	0	3.76291	0	3.08647	0			-0.018071	6.04659	1.07806	8.43909	1.90593	2.45612	1.07806	3.47174	2.58548	-0.018071	6.95614	3.74484	3.0684
102	27.6172	0.120929	9.23778	0.0699434			0	0.017689	0	6.06488	0	1.09403	0	8.45771	0	1.92372	0	2.47354	0	1.09403	0	3.46712	0	2.60111	0	0	6.96554	0	3.71618	0	3.05969	0			-0.017689	6.0472	1.07634	8.44002	1.90603	2.45585	1.07634	3.44943	2.58342	-0.017689	6.94785	3.69849	3.042
103	27.8203	0.120929	9.32016	0.0637225			0	0.017645	0	6.06707	0	1.09304	0	8.46047	0	1.9242	0	2.47407	0	1.09304	0	3.45221	0	2.59944	0	0	6.95685	0	3.68028	0	3.04313	0			-0.017645	6.04942	1.0754	8.44283	1.90656	2.45643	1.0754	3.43456	2.5818	-0.017645	6.93921	3.66264	3.02549
104	28.0234	0.120929	9.42517	0.057569			0	0.017459	0	6.06709	0	1.09203	0	8.46022	0	1.92404	0	2.47391	0	1.09203	0	3.43199	0	2.59633	0	0	6.9495	0	3.65874	0	3.02782	0			-0.017459	6.04963	1.07457	8.44276	1.90658	2.45645	1.07457	3.41453	2.57887	-0.017459	6.93204	3.64128	3.01036
105	28.2266	0.120929	9.53644	0.0531048			0	0.017204	0	6.06706	0	1.09137	0	8.45992	0	1.92393	0	2.47378	0	1.09137	0	3.40855	0	2.5927	0	0	6.94295	0	3.6208	0	3.00737	0			-0.017204	6.04986	1.07417	8.44272	1.90673	2.45658	1.07417	3.39134	2.5755	-0.017204	6.92575	3.6036	2.99017
106	28.4297	0.120929	9.66404	0.0499104			0	0.016782	0	6.06524	0	1.09044	0	8.4578	0	1.92307	0	2.47246	0	1.09044	0	3.38049	0	2.58734	0	0	6.93772	0	3.61174	0	2.99606	0			-0.016782	6.04846	1.07366	8.44102	1.90629	2.45568	1.07366	3.36371	2.57056	-0.016782	6.92094	3.59496	2.97928
107	28.6328	0.120929	9.73933	0.0487427			0	0.016527	0	6.06666	0	1.09012	0	8.45993	0	1.92336	0	2.47303	0	1.09012	0	3.36401	0	2.58338	0	0	6.93107	0	3.59236	0	2.98655	0			-0.016527	6.05013	1.0736	8.44341	1.90683	2.4565	1.0736	3.34748	2.56685	-0.016527	6.91454	3.57583	2.97002
108	28.8359	0.120929	9.83208	0.0481073			0	0.01612	0	6.06735	0	1.08952	0	8.46086	0	1.92323	0	2.47303	0	1.08952	0	3.34352	0	2.57804	0	0	6.92733	0	3.57549	0	2.97723	0			-0.01612	6.05123	1.0734	8.44474	1.90711	2.45691	1.0734	3.3274	2.56192	-0.01612	6.91121	3.55937	2.96111
109	29.0391	0.120929	9.96189	0.0482391			0	0.016251	0	6.06381	0	1.08889	0	8.45611	0	1.92221	0	2.47148	0	1.08889	0	3.31672	0	2.56981	0	0	6.92275	0	3.56172	0	2.9656	0			-0.016251	6.04756	1.07264	8.43985	1.90596	2.45523	1.07264	3.30047	2.55356	-0.016251	6.9065	3.54547	2.94935
110	29.2422	0.120929	10.0336	0.0486639			0	0.01609	0	6.06423	0	1.08877	0	8.45689	0	1.92241	0	2.47173	0	1.08877	0	3.30267	0	2.56411	0	0	6.92092	0	3.54929	0	2.96179	0			-0.01609	6.04814	1.07268	8.4408	1.90632	2.45564	1.07268	3.28658	2.54802	-0.01609	6.90483	3.5332	2.9457
111	29.4453	0.120929	10.0922	0.0484045			0	0.015397	0	6.06537	0	1.08819	0	8.45841	0	1.92214	0	2.47182	0	1.08819	0	3.29271	0	2.55687	0	0	6.91951	0	3.53988	0	2.95762	0			-0.015397	6.04997	1.07279	8.44301	1.90674	2.45642	1.07279	3.27731	2.54147	-0.015397	6.90411	3.52448	2.94222
112	29.6484	0.120929	10.1363	0.0486492			0	0.013014	0	6.0713	0	1.07124	0	8.24756	0	1.92187	0	2.47251	0	1.07124	0	3.28296	0	2.55005	0	0	6.91605	0	3.55907	0	2.99841	0			-0.013014	6.05828	1.05822	8.23455	1.90885	2.4595	1.05822	3.26995	2.53704	-0.013014	6.90304	3.54606	2.9854
113	29.8516	0.120929	10.2494	0.049357			0	0.015419	0	6.06373	0	1.08759	0	8.45737	0	1.92167	0	2.47134	0	1.08759	0	3.26818	0	2.5396	0	0	6.91362	0	3.52597	0	2.94495	0			-0.015419	6.04831	1.07217	8.44195	1.90625	2.45592	1.07217	3.25276	2.52418	-0.015419	6.8982	3.51055	2.92953
114	30.0547	0.120929	10.3303	0.0503253			0	0.014749	0	6.0624	0	1.08685	0	8.45537	0	1.92078	0	2.47016	0	1.08685	0	3.25598	0	2.52927	0	0	6.91442	0	3.52299	0	2.94937	0			-0.014749	6.04765	1.0721	8.44062	1.90603	2.45541	1.0721	3.24124	2.51452	-0.014749	6.89967	3.50824	2.93462
115	30.2578	0.120929	10.3823	0.0508464			0	0.013747	0	6.064	0	1.08626	0	8.45807	0	1.92065	0	2.47051	0	1.08626	0	3.24849	0	2.52127	0	0	6.91271	0	3.51781	0	2.93882	0			-0.013747	6.05025	1.07252	8.44433	1.9069	2.45676	1.07252	3.23475	2.50752	-0.013747	6.89896	3.50406	2.92507
116	30.4609	0.120929	10.4457	0.0512131			0	0.013516	0	6.06438	0	1.0861	0	8.45839	0	1.92063	0	2.47036	0	1.0861	0	3.24161	0	2.51137	0	0	6.91211	0	3.51515	0	2.93771	0			-0.013516	6.05087	1.07259	8.44487	1.90712	2.45684	1.07259	3.2281	2.49785	-0.013516	6.89859	3.50163	2.92419
117	30.6641	0.120929	10.5224	0.0524275			0	0.013276	0	6.06185	0	1.08546	0	8.45449	0	1.91972	0	2.46908	0	1.08546	0	3.23307	0	2.49994	0	0	6.91084	0	3.51119	0	2.93571	0			-0.013276	6.04857	1.07219	8.44121	1.90644	2.4558	1.07219	3.2198	2.48666	-0.013276	6.89756	3.49791	2.92243
118	30.8672	0.120929	10.5783	0.0531904			0	0.012873	0	6.06162	0	1.08492	0	8.45429	0	1.91934	0	2.46867	0	1.08492	0	3.2277	0	2.49051	0	0	6.91185	0	3.50901	0	2.93472	0			-0.012873	6.04875	1.07205	8.44142	1.90646	2.4558	1.07205	3.21483	2.47764	-0.012873	6.89898	3.49614	2.92185
119	31.0703	0.120929	10.6457	0.0928653			0	0.013079	0	6.06152	0	1.08505	0	8.45394	0	1.91957	0	2.46942	0	1.08505	0	3.22354	0	0	0	0	6.91173	0	3.5076	0	2.9332	0			-0.013079	6.04844	1.07197	8.44086	1.90649	2.45634	1.07197	3.21047	-0.013079	-0.013079	6.89865	3.49452	2.92012
120	31.2734	0.120929	10.7159	0.106608			0	0.01285	0	6.05999	0	1.08456	0	8.45234	0	1.91879	0	2.46844	0	1.08456	0	3.21851	0	0	0	0	6.91074	0	3.5051	0	2.94103	0			-0.01285	6.04714	1.07171	8.43949	1.90594	2.45559	1.07171	3.20566	-0.01285	-0.01285	6.89789	3.49225	2.92818
121	31.4766	0.120929	10.7523	0.114669			0	0.012341	0	6.06104	0	1.08422	0	8.45404	0	1.91867	0	2.46738	0	1.08422	0	3.21575	0	0	0	0	6.91028	0	3.50314	0	2.93197	0			-0.012341	6.0487	1.07188	8.4417	1.90633	2.45504	1.07188	3.20341	-0.012341	-0.012341	6.89794	3.4908	2.91963
122	31.6797	0.120929	10.8162	0.130637			0	0.012549	0	6.05973	0	1.08383	0	8.45252	0	1.91839	0	2.46622	0	1.08383	0	3.21237	0	0	0	0	6.90943	0	3.50276	0	2.93301	0			-0.012549	6.04718	1.07128	8.43997	1.90584	2.45367	1.07128	3.19982	-0.012549	-0.012549	6.89688	3.49021	2.92046
123	31.8828	0.120929	10.8771	0.148203			0	0.012406	0	6.05833	0	1.0834	0	8.45057	0	1.91777	0	2.46658	0	1.0834	0	3.20922	0	0	0	0	6.90847	0	3.50186	0	2.93336	0			-0.012406	6.04593	1.071	8.43817	1.90536	2.45417	1.071	3.19681	-0.012406	-0.012406	6.89606	3.48945	2.92095
124	32.0859	0.120929	10.8684	0.145556			0	0.010368	0	6.06015	0	1.0826	0	8.45363	0	1.91755	0	2.46665	0	1.0826	0	3.20759	0	0	0	0	6.95097	0	3.51963	0	2.94354	0			-0.010368	6.04978	1.07224	8.44326	1.90718	2.45628	1.07224	3.19722	-0.010368	-0.010368	6.9406	3.50926	2.93317
125	32.2891	0.120929	3.49329	0.0791404			0	0.18747	0	6.46338	0	1.50711	0	8.56957	0	2.0989	0	0	0	1.50711	0	3.23295	0	0	0	0	6.91637	0	3.50492	0	3.19865	0			-0.18747	6.27591	1.31964	8.3821	1.91143	-0.18747	1.31964	3.04548	-0.18747	-0.18747	6.7289	3.31745	3.01118
126	32.4922	0.120929	2.55749	0.0597185			0	-0.011932	0	5.83071	0	1.4072	0	8.3075	0	2.00049	0	0	0	1.4072	0	3.26761	0	0	0	0	6.91378	0	3.50283	0	3.19542	0			0.011932	5.84265	1.41913	8.31944	2.01243	0.011932	1.41913	3.27954	0.011932	0.011932	6.92571	3.51476	3.20735
127	32.6953	0.120929	2.37928	0.0683263			0	-0.191523	0	5.83084	0	1.22777	0	8.10799	0	2.03516	0	0	0	1.22777	0	3.25045	0	0	0	0	6.35325	0	3.38064	0	2.97062	0			0.191523	6.02236	1.41929	8.29952	2.22668	0.191523	1.41929	3.44197	0.191523	0.191523	6.54477	3.57216	3.16214
128	32.8984	0.120929	10.2033	0.044056			0	0.007357	0	6.05883	0	1.08053	0	8.44978	0	1.91492	0	0	0	1.08053	0	3.26606	0	0	0	0	6.21948	0	3.4637	0	0	0			-0.007357	6.05148	1.07317	8.44243	1.90757	-0.007357	1.07317	3.2587	-0.007357	-0.007357	6.21212	3.45634	-0.007357

## Sheet: pKa fitting Mnova
									pK1,0	1.38542	DpK1,0	0.151121			Solver model for fit to extract pKa values														Fitting to extract uncertainty in fitted pKa values	pK2,0	1.46346							pK2,0	1.53654						pK2,0	1.47893
									pK2,0	5.83332	DpK2,0	0.247543			No constraints	dH3 constrained	dH3 and dL3 constrained									Solver error analysis fit unconstrained	Solver error analysis fit dH3 constrained			pK2,0	6.08086							pK2,0	6.06475						pK2,0	5.99769
									pK3,0	9.1179	DpK3,0	0.16879			FALSE	FALSE	FALSE									FALSE	FALSE			pK3,0	9.28669							pK3,0	9.28244						pK3,0	9.25981
															15	15	15									45	45
									Dz2 pK1	3					100	TRUE	TRUE									100	TRUE			Dz2 pK1 (linked)	3							Dz2 pK1 (linked)	3						Dz2 pK1 (linked)	3
									Dz2 pK2	1					100	TRUE	TRUE									100	TRUE			Dz2 pK2 (linked)	1							Dz2 pK2 (linked)	1						Dz2 pK2 (linked)	1
									Dz2 pK3	-1						TRUE	TRUE										TRUE			Dz2 pK3 (linked)	-1							Dz2 pK3 (linked)	-1						Dz2 pK3 (linked)	-1
																100	TRUE										TRUE
																100	TRUE										TRUE
									Iterate on these with Solver to adjust overall R2 to 1								FALSE										TRUE			Iterate on these with Solver to adjust overall R2 to 1								Iterate on these with Solver to adjust overall R2 to 1							Iterate on these with Solver to adjust overall R2 to 1
									pK1	1.74392							100										TRUE			pK1	1.82195							pK1	1.89504						pK1	1.83742
									pK2	5.95282							100										TRUE			pK2	6.20036							pK2	6.18425						pK2	6.11718
									pK3	8.9984																	TRUE			pK3	9.16719							pK3	9.16294						pK3	9.14031
																Initial guesses (copy and paste values)											100
									dH3/ppm	7.47402	4.49225	3.49931				pK1	2										100			dH3/ppm	7.46158	4.43078	3.4776					dH3/ppm	7.44746	4.38201	3.45886				dH3/ppm	7.45505	4.41783	3.47143
									dH2L/ppm	7.35994	4.00616	3.322				pK2	6													dH2L/ppm	7.35927	4.00619	3.32175					dH2L/ppm	7.36024	4.00677	3.32226				dH2L/ppm	7.36058	4.00731	3.32257
									dHL2/ppm	7.01469	3.95336	3.18143				pK3	9													dHL2/ppm	7.01458	3.95557	3.18245					dHL2/ppm	7.01575	3.95764	3.18382				dHL2/ppm	7.01886	3.95744	3.18474
									dL3/ppm	6.89289	3.48561	2.92122																		dL3/ppm	6.89097	3.47776	2.91685					dL3/ppm	6.89069	3.47729	2.91657				dL3/ppm	6.89085	3.4804	2.9181
									Constraint for dH3/ppm:	7.89756	4.49225	3.92012				dH3/ppm	7.39349	4.14517	3.37369									R2 (all three sets of parameters):	0.98927	Constraint for dH3/ppm:	7.89756	4.49225	3.92012					Constraint for dH3/ppm:	7.89756	4.49225	3.92012				Constraint for dH3/ppm:	7.89756	4.49225	3.92012
									Constraint for dL3/ppm:	6.39349	3.14517	2.37369				dH2L/ppm	7.14553	3.81871	3.14691											Constraint for dL3/ppm:	6.39349	3.14517	2.37369					Constraint for dL3/ppm:	6.39349	3.14517	2.37369				Constraint for dL3/ppm:	6.39349	3.14517	2.37369
Average ionic strength/M:	0.120929								R2 (Optimise to 1 with Solver):	0.998089						dHL2/ppm	7.02155	3.65548	3.03351											R2 (all resonances):	0.996661							R2 (all resonances):	0.996031						R2 (all resonances):	0.996577
These are copied from the pH spreadsheet					Referenced analyte shifts				R2 (each resonance):	0.999825	0.999538	0.998726				dL3/ppm	6.89756	3.49225	2.92012											R2 (each resonance):	0.999422	0.998739	0.9985					R2 (each resonance):	0.999426	0.998309	0.998296				R2 (each resonance):	0.99958	0.998633	0.998364
	Row on CSI image	Height from tube base/mm	pH		Imidazole upfield	Alpha	Beta downfield			Imidazole upfield	Alpha	Beta downfield																	pH + random error 1		Imidazole upfield	Alpha	Beta downfield				pH + random error 2		Imidazole upfield	Alpha	Beta downfield			pH + random error 3		Imidazole upfield	Alpha	Beta downfield
	19	10.7578	2.16325		7.39194	4.14511	3.37341			7.39135	4.14018	3.37087																	2.12935		7.39302	4.14633	3.37319				2.19206		7.38947	4.13261	3.36806			2.23295		7.38765	4.12505	3.36525
	20	10.9609	2.17148		7.39349	4.14517	3.37369			7.39092	4.13835	3.37021																	2.13393		7.39278	4.14534	3.37282				2.18283		7.38988	4.13439	3.36871			2.13039		7.39244	4.14583	3.37279
	21	11.1641	2.16983		7.39134	4.14191	3.37089			7.39101	4.13872	3.37034																	2.15624		7.39163	4.14058	3.37108				2.12641		7.39248	4.14556	3.37277			2.19836		7.38922	4.13185	3.36772
	22	11.3672	2.18716		7.39218	4.14205	3.3724			7.39011	4.1349	3.36895																	2.12987		7.39299	4.14622	3.37315				2.20037		7.38909	4.13102	3.36748			2.20496		7.38891	4.13053	3.36724
	23	11.5703	2.17955		7.39104	4.13987	3.37063			7.3905	4.13657	3.36956																	2.13798		7.39257	4.14447	3.3725				2.14054		7.39182	4.14272	3.37174			2.25421		7.38671	4.12098	3.36378
	24	11.7734	2.19027		7.3906	4.13954	3.37016			7.38995	4.13423	3.3687																	2.17035		7.39092	4.13761	3.36999				2.16493		7.39069	4.13789	3.36998			2.18264		7.38995	4.13501	3.36887
	25	11.9766	2.18327		7.39177	4.13875	3.37105			7.39031	4.13575	3.36926																	2.21737		7.38859	4.128	3.36645				2.17031		7.39045	4.13683	3.3696			2.19024		7.38959	4.13348	3.36831
	26	12.1797	2.20406		7.3875	4.13335	3.36703			7.38925	4.13125	3.36762																	2.27619		7.38584	4.11658	3.36226				2.25641		7.38665	4.12053	3.36366			2.18996		7.38961	4.13353	3.36833
	27	12.3828	2.21821		7.38825	4.13199	3.36687			7.38855	4.12825	3.36652																	2.27256		7.386	4.11726	3.36251				2.23525		7.38756	4.12443	3.36508			2.24223		7.38724	4.12326	3.36461
	28	12.5859	2.21217		7.38563	4.12905	3.36559			7.38885	4.12953	3.36699																	2.16414		7.39123	4.13892	3.37046				2.20722		7.38879	4.12971	3.367			2.16174		7.39093	4.13928	3.37042
	29	12.7891	2.22809		7.38857	4.1288	3.36699			7.38806	4.12618	3.36576																	2.20492		7.3892	4.1305	3.36737				2.22998		7.38779	4.12541	3.36544			2.22928		7.38781	4.12576	3.36551
	30	12.9922	2.22913		7.38766	4.1273	3.36529			7.38801	4.12596	3.36568																	2.29007		7.38521	4.11399	3.36131				2.21166		7.38859	4.12887	3.36669			2.18994		7.38961	4.13354	3.36833
	31	13.1953	2.24747		7.38599	4.12478	3.36384			7.38712	4.12219	3.36431																	2.29538		7.38498	4.113	3.36095				2.29541		7.38502	4.11354	3.36111			2.18411		7.38988	4.13471	3.36876
	32	13.3984	2.23528		7.38533	4.12248	3.3633			7.38771	4.12469	3.36522																	2.23638		7.38769	4.12423	3.36507				2.18285		7.38988	4.13439	3.36871			2.29405		7.38501	4.11359	3.3611
	33	13.6016	2.24471		7.38538	4.12004	3.36313			7.38725	4.12275	3.36451																	2.30035		7.38476	4.11209	3.36061				2.22333		7.38808	4.12666	3.36589			2.24063		7.38731	4.12357	3.36472
	34	13.8047	2.26111		7.38563	4.11648	3.36153			7.38647	4.11944	3.3633																	2.25561		7.38678	4.12049	3.3637				2.27276		7.38596	4.11757	3.36258			2.27013		7.38602	4.11799	3.36269
	35	14.0078	2.276		7.38525	4.11503	3.36108			7.38578	4.11649	3.36223																	2.28847		7.38528	4.11428	3.36142				2.29007		7.38524	4.11448	3.36146			2.25469		7.38669	4.12089	3.36374
	36	14.2109	2.2868		7.38484	4.11364	3.36092			7.38528	4.11438	3.36146																	2.27221		7.38602	4.11733	3.36254				2.33904		7.38327	4.10603	3.35838			2.29954		7.38478	4.1126	3.36074
	37	14.4141	2.30856		7.38415	4.11151	3.35955			7.3843	4.11022	3.35994																	2.29477		7.385	4.11312	3.36099				2.28332		7.38552	4.11568	3.36189			2.33329		7.3834	4.10663	3.35857
	38	14.6172	2.31072		7.38394	4.10908	3.35881			7.38421	4.10981	3.35979																	2.25893		7.38663	4.11985	3.36346				2.34949		7.38287	4.10429	3.35774			2.30325		7.38462	4.11193	3.3605
	39	14.8203	2.33518		7.38317	4.10567	3.3583			7.38314	4.10529	3.35814																	2.36389		7.38205	4.10089	3.3565				2.26394		7.38633	4.11916	3.36316			2.31287		7.38423	4.11022	3.35987
	40	15.0234	2.33817		7.38284	4.10436	3.35737			7.38301	4.10475	3.35794																	2.36721		7.38192	4.10033	3.35629				2.40593		7.38075	4.0952	3.35443			2.34605		7.38289	4.10443	3.35777
	41	15.2266	2.34688		7.38246	4.10084	3.35527			7.38264	4.10318	3.35737																	2.3915		7.38094	4.09629	3.35481				2.31444		7.38425	4.11022	3.35991			2.3062		7.3845	4.1114	3.3603
	42	15.4297	2.38588		7.37993	4.09618	3.35348			7.38104	4.09639	3.35489																	2.43595		7.37924	4.08924	3.35222				2.36147		7.38241	4.10231	3.35702			2.32821		7.3836	4.10751	3.35889
	43	15.6328	2.39258		7.3788	4.09344	3.35325			7.38078	4.09527	3.35448																	2.39509		7.3808	4.09571	3.3546				2.45062		7.37917	4.08843	3.35197			2.48979		7.37772	4.08204	3.34965
	44	15.8359	2.41358		7.37824	4.09099	3.35231			7.37996	4.0918	3.35321																	2.40945		7.38024	4.09339	3.35375				2.48934		7.37787	4.08288	3.34994			2.39437		7.38104	4.09643	3.35487
	45	16.0391	2.432		7.37946	4.09002	3.35249			7.37926	4.08884	3.35213																	2.48496		7.37747	4.08196	3.34955				2.40554		7.38076	4.09526	3.35445			2.43303		7.37964	4.09037	3.35267
	46	16.2422	2.4359		7.37903	4.08496	3.35112			7.37912	4.08823	3.35191																	2.41048		7.3802	4.09323	3.35369				2.49052		7.37783	4.08271	3.34988			2.54499		7.37599	4.07458	3.34694
	47	16.4453	2.468		7.37781	4.08108	3.34962			7.37795	4.08331	3.35011																	2.54947		7.37534	4.07314	3.34631				2.42061		7.38022	4.09294	3.35361			2.49326		7.37761	4.08155	3.34947
	48	16.6484	2.49085		7.37963	4.07974	3.34989			7.37716	4.07995	3.34888																	2.45109		7.37868	4.08694	3.35137				2.4271		7.37999	4.09195	3.35325			2.49883		7.37743	4.08078	3.34919
	49	16.8516	2.50108		7.38027	4.07957	3.35026			7.37681	4.07849	3.34835																	2.61269		7.37345	4.06533	3.34344				2.60497		7.37439	4.06798	3.34451			2.4775		7.37812	4.08379	3.35028
	50	17.0547	2.52869		7.37766	4.07208	3.34732			7.37591	4.07466	3.34695																	2.58563		7.37423	4.06858	3.34463				2.64871		7.37322	4.06299	3.34269			2.53798		7.3762	4.07549	3.34727
	51	17.2578	2.564		7.3755	4.06831	3.34559			7.37481	4.07001	3.34525																	2.64402		7.37258	4.06175	3.34212				2.58121		7.37506	4.07084	3.34555			2.62961		7.37361	4.06432	3.34321
	52	17.4609	2.58739		7.37491	4.06551	3.34477			7.37411	4.06707	3.34417																	2.53477		7.37581	4.07508	3.34702				2.67375		7.37259	4.06029	3.34171			2.52832		7.3765	4.07677	3.34773
	53	17.6641	2.61226		7.37462	4.06183	3.34323			7.3734	4.06408	3.34308																	2.58824		7.37416	4.06826	3.34451				2.62609		7.37382	4.06553	3.34362			2.559		7.37558	4.07278	3.34628
	54	17.8672	2.65142		7.37209	4.05719	3.34089			7.37234	4.05963	3.34145																	2.63254		7.37289	4.06304	3.34259				2.7538		7.37073	4.05237	3.33882			2.72044		7.3714	4.05479	3.33975
	55	18.0703	2.70251		7.3726	4.05592	3.34038			7.37106	4.05428	3.33949																	2.62589		7.37308	4.0638	3.34287				2.74001		7.37103	4.05366	3.33929			2.81697		7.36939	4.04621	3.33662
	56	18.2734	2.71614		7.37387	4.0533	3.34051			7.37074	4.05293	3.339																	2.64183		7.37264	4.062	3.34221				2.78057		7.37016	4.04996	3.33793			2.71038		7.37162	4.05578	3.3401
	57	18.4766	2.75334		7.37249	4.04951	3.33942			7.3699	4.04943	3.33771																	2.68355		7.37154	4.0575	3.34055				2.71546		7.37159	4.05603	3.34015			2.88094		7.36824	4.04132	3.33484
	58	18.6797	2.79437		7.36956	4.04444	3.33697			7.36904	4.04584	3.3364																	2.81232		7.36863	4.04554	3.33615				2.93647		7.36732	4.038	3.33356			2.947		7.36718	4.03685	3.33321
	59	18.8828	2.85379		7.37081	4.04192	3.3364			7.3679	4.04112	3.33466																	2.78071		7.36928	4.04823	3.33714				2.89942		7.36793	4.04053	3.33449			2.96723		7.36688	4.0356	3.33275
	60	19.0859	2.88795		7.37054	4.03897	3.3358			7.3673	4.03864	3.33375																	2.85042		7.36789	4.04252	3.33504				2.79142		7.36993	4.04901	3.33759			2.9424		7.36725	4.03715	3.33332
	61	19.2891	2.94754		7.36759	4.03477	3.33356			7.36633	4.0347	3.3323																	2.96998		7.36587	4.03434	3.33202				2.97193		7.36678	4.03573	3.33273			2.8261		7.36922	4.04548	3.33636
	62	19.4922	2.8629		7.36765	4.03275	3.33292			7.36773	4.04044	3.33441																	2.92724		7.36654	4.03705	3.33302				2.81066		7.36955	4.04737	3.33699			2.79302		7.36986	4.0482	3.33735
	63	19.6953	2.91769		7.36751	4.03104	3.33257			7.3668	4.03662	3.33301																	2.88077		7.36733	4.04026	3.33421				2.85761		7.36866	4.04362	3.33562			2.92288		7.36755	4.03842	3.33378
	64	19.8984	2.9706		7.36618	4.02793	3.33163			7.36598	4.0333	3.33178																	2.97607		7.36578	4.03397	3.33188				3.0531		7.36566	4.0311	3.33103			2.95304		7.36709	4.03647	3.33307
	65	20.1016	3.04238		7.36688	4.027	3.33148			7.36499	4.02935	3.33032																	3.04735		7.36478	4.02999	3.33041				3.00735		7.36627	4.03362	3.33196			3.12551		7.36488	4.02735	3.32972
	66	20.3047	3.11326		7.36502	4.02415	3.33			7.36413	4.02597	3.32906																	3.12269		7.36387	4.02637	3.32906				3.19595		7.36405	4.02458	3.32862			3.25304		7.36362	4.0224	3.32789
	67	20.5078	3.19287		7.36303	4.02072	3.32849			7.36327	4.02273	3.32784																	3.26568		7.36244	4.02087	3.32701				3.4034		7.3623	4.01796	3.32614			3.21185		7.364	4.02386	3.32843
	68	20.7109	3.3061		7.36228	4.01867	3.32699			7.36222	4.01898	3.32641																	3.25338		7.36254	4.02128	3.32716				3.30751		7.36304	4.02067	3.32716			3.35595		7.36278	4.01928	3.32671
	69	20.9141	3.35844		7.3629	4.0183	3.32771			7.36178	4.01753	3.32585																	3.45043		7.36102	4.01585	3.32509				3.42821		7.36213	4.01735	3.3259			3.43957		7.36218	4.01719	3.32591
	70	21.1172	3.50366		7.3611	4.01647	3.3266			7.36068	4.01425	3.32453																	3.54838		7.3604	4.01389	3.32432				3.52735		7.36148	4.0152	3.32506			3.61147		7.3611	4.01392	3.3246
	71	21.3203	3.59539		7.36323	4.01786	3.32779			7.36003	4.01265	3.32384																	3.74106		7.35931	4.01106	3.32313				3.62477		7.3609	4.01348	3.32437			3.59518		7.3612	4.01419	3.32471
	72	21.5234	3.68199		7.36139	4.01571	3.32631			7.35941	4.01139	3.32327																	3.76011		7.3592	4.01083	3.32303				3.72652		7.36032	4.01204	3.32376			3.71238		7.3605	4.01249	3.32399
	73	21.7266	3.79088		7.35943	4.01436	3.32568			7.35861	4.01009	3.32261																	3.79573		7.359	4.01044	3.32285				3.93884		7.35908	4.00984	3.3227			3.93175		7.35914	4.01024	3.32286
	74	21.9297	3.87111		7.35743	4.01287	3.32419			7.35796	4.0093	3.32215																	3.98651		7.35788	4.00876	3.32197				3.94809		7.35902	4.00976	3.32265			3.93715		7.3591	4.0102	3.32284
	75	22.1328	3.97499		7.3563	4.01138	3.32262			7.35702	4.00842	3.32157																	4.05876		7.3574	4.00826	3.32165				4.1217		7.35781	4.00855	3.32187			4.09781		7.35788	4.00906	3.32208
	76	22.3359	4.09159		7.35385	4.00926	3.32082			7.35578	4.00759	3.32088																	4.19123		7.35637	4.00749	3.32107				4.19126		7.35722	4.00815	3.32155			4.20225		7.3569	4.00845	3.32155
	77	22.5391	4.17691		7.35268	4.00829	3.32036			7.35468	4.00705	3.32033																	4.23681		7.35596	4.00726	3.32085				4.3927		7.35505	4.00716	3.32049			4.28111		7.35602	4.00804	3.32112
	78	22.7422	4.30883		7.35047	4.00794	3.31908			7.3526	4.00628	3.31936																	4.49482		7.35284	4.0061	3.31939				4.41501		7.35475	4.00706	3.32035			4.49198		7.35289	4.00704	3.31971
	79	22.9453	4.43439		7.34761	4.00735	3.31737			7.35003	4.00557	3.31822																	4.66093		7.34975	4.00537	3.31807				4.7041		7.34934	4.00576	3.31803			4.70035		7.34812	4.00601	3.31769
	80	23.1484	4.61642		7.34294	4.00506	3.31422			7.34489	4.00445	3.31604																	4.71405		7.34852	4.00512	3.31755				4.73673		7.3485	4.0056	3.31768			4.79255		7.34525	4.00549	3.3165
	81	23.3516	4.74916		7.33808	4.00489	3.31217			7.33973	4.0035	3.31389																	4.86343		7.3442	4.00433	3.31576				4.91489		7.34275	4.00461	3.31532			4.97218		7.33783	4.00425	3.31346
	82	23.5547	4.98515		7.32567	4.00041	3.30425			7.32644	4.00127	3.30842																	5.15168		7.33104	4.00222	3.31039				5.16569		7.33017	4.00266	3.31022			5.14158		7.32795	4.00272	3.30945
	83	23.7578	5.22601		7.29569	3.99592	3.29059			7.30544	3.99794	3.29984																	5.46593		7.30564	3.99838	3.3001				5.67266		7.27913	3.99522	3.28966			5.40377		7.30521	3.9993	3.30025
	84	23.9609	5.50652		7.26836	3.9925	3.27831			7.26895	3.99226	3.28495																	5.8109		7.25938	3.99149	3.28136				5.70711		7.2741	3.99449	3.28763			5.73938		7.25966	3.99256	3.28185
	85	24.1641	5.81386		7.21116	3.98537	3.25929			7.21462	3.98383	3.26278																	6.18853		7.18913	3.98098	3.25288				6.18757		7.18718	3.98185	3.2526			5.97953		7.21649	3.98616	3.26439
	86	24.3672	6.03284		7.17356	3.97862	3.24613			7.1713	3.97705	3.24507																	6.25463		7.17599	3.97898	3.24755				6.16323		7.19202	3.98257	3.25455			6.1888		7.1755	3.98003	3.24779
	87	24.5703	6.26		7.1289	3.97282	3.22911			7.1284	3.9702	3.22747																	6.3684		7.15375	3.97558	3.23849				6.46261		7.13429	3.97395	3.23117			6.42617		7.13107	3.97322	3.22972
	88	24.7734	6.45452		7.10135	3.96691	3.21991			7.09695	3.96497	3.21446																	6.70336		7.09643	3.96639	3.21497				6.71683		7.09333	3.96743	3.2144			6.68581		7.09096	3.9667	3.21323
	89	24.9766	6.65356		7.08052	3.96112	3.20633			7.07137	3.96034	3.20371																	6.93493		7.06734	3.96106	3.20271				6.77174		7.08589	3.96616	3.21131			6.96725		7.06015	3.96078	3.20014
	90	25.1797	6.85764		7.05692	3.95827	3.19647			7.05189	3.95618	3.19523																	7.14325		7.04853	3.95669	3.19436				7.22977		7.04258	3.95657	3.1923			7.20361		7.04311	3.95613	3.19225
	91	25.3828	7.19484		7.04155	3.95409	3.1901			7.03134	3.94933	3.18512																	7.2764		7.03951	3.95384	3.19				7.24189		7.04182	3.95631	3.19193			7.22958		7.04163	3.95559	3.1915
	92	25.5859	7.25823		7.02941	3.94881	3.18079			7.02862	3.94784	3.18351																	7.54418		7.02644	3.94707	3.18244				7.55644		7.02655	3.94846	3.18313			7.4743		7.03036	3.94983	3.18502
	93	25.7891	7.51644		7.01779	3.94221	3.17322			7.0198	3.94018	3.17696																	7.70467		7.02071	3.9416	3.17795				7.77942		7.01911	3.94019	3.17676			7.79699		7.02011	3.93812	3.1761
	94	25.9922	7.76418		7.01166	3.92764	3.16644			7.01304	3.92872	3.16932																	7.84683		7.01633	3.93529	3.17352				7.87873		7.01618	3.93528	3.17347			7.94345		7.01604	3.93002	3.17093
	95	26.1953	7.9365		7.006	3.91468	3.15626			7.00833	3.91689	3.16219																	8.36795		6.99976	3.89078	3.14709				8.36003		7.00081	3.89296	3.14847			8.30849		7.00442	3.89681	3.15147
	96	26.3984	8.23863		6.99599	3.89078	3.14525			6.99825	3.88461	3.14367																	8.28224		7.00294	3.90125	3.15306				8.52214		6.99385	3.86876	3.13478			8.29452		7.00495	3.89852	3.15244
	97	26.6016	8.39082		6.98785	3.85695	3.13168			6.99165	3.86118	3.13047																	8.59553		6.98962	3.85502	3.12691				8.57321		6.99136	3.85985	3.12977			8.53444		6.99456	3.86314	3.13237
	98	26.8047	8.55738		6.97865	3.8208	3.11414			6.98299	3.8293	3.11262																	8.84357		6.97539	3.80209	3.09731				8.77759		6.97996	3.81788	3.10626			8.8567		6.9755	3.7944	3.09374
	99	27.0078	8.74809		6.96727	3.78647	3.0907			6.97127	3.7853	3.08805																	8.83961		6.97564	3.80304	3.09784				8.77841		6.97991	3.81769	3.10616			8.80799		6.97875	3.80625	3.10038
	100	27.2109	8.84706		6.95614	3.74484	3.0684			6.96459	3.76001	3.07395																	9.05275		6.96119	3.74816	3.06725				9.17567		6.95251	3.71409	3.04837			9.06326		6.96077	3.74018	3.06337
	101	27.4141	9.0996		6.94785	3.69849	3.042			6.94686	3.69246	3.03632																	9.28676		6.94447	3.6841	3.03159				9.2049		6.95039	3.70601	3.04387			9.21539		6.94949	3.69846	3.04003
	102	27.6172	9.23778		6.93921	3.66264	3.02549			6.9375	3.65668	3.01641																	9.28706		6.94445	3.68402	3.03154				9.37435		6.9384	3.66022	3.01837			9.30939		6.94266	3.67315	3.02587
	103	27.8203	9.32016		6.93204	3.64128	3.01036			6.93227	3.63666	3.00526																	9.4819		6.93139	3.63376	3.00359				9.39214		6.93719	3.6556	3.0158			9.42941		6.93438	3.6424	3.00866
	104	28.0234	9.42517		6.92575	3.6036	2.99017			6.9261	3.61304	2.99212																	9.57265		6.92591	3.61264	2.99184				9.52376		6.9287	3.62311	2.99772			9.57864		6.92509	3.60786	2.98935
	105	28.2266	9.53644		6.92094	3.59496	2.97928			6.92027	3.59071	2.97969																	9.64144		6.92207	3.59784	2.98361				9.65569		6.92115	3.5942	2.98162			9.68728		6.91918	3.58588	2.97706
	106	28.4297	9.66404		6.91454	3.57583	2.97002			6.91453	3.5687	2.96745																	9.71983		6.91805	3.58234	2.97499				9.74092		6.91685	3.57772	2.97245			9.75161		6.91604	3.57421	2.97054
	107	28.6328	9.73933		6.91121	3.55937	2.96111			6.91162	3.5575	2.96122																	9.86618		6.91159	3.55741	2.96113				9.85837		6.91169	3.55791	2.96143			9.78659		6.91445	3.56829	2.96723
	108	28.8359	9.83208		6.9065	3.54547	2.94935			6.90847	3.54545	2.95451																	9.94052		6.90881	3.54668	2.95517				9.97541		6.90739	3.5414	2.95224			9.92297		6.90899	3.54795	2.95586
	109	29.0391	9.96189		6.90483	3.5332	2.9457			6.90484	3.5315	2.94675																	10.039		6.90562	3.53435	2.94831				10.0399		6.90535	3.53359	2.9479			10.0803		6.90404	3.52953	2.94556
	110	29.2422	10.0336		6.90411	3.52448	2.94222			6.90317	3.52511	2.94319																	10.115		6.90351	3.52619	2.94377				10.0829		6.90411	3.52885	2.94526			10.1238		6.9029	3.52529	2.94319
	111	29.4453	10.0922		6.90304	3.54606	2.9854			6.90197	3.52049	2.94062																	10.1225		6.90331	3.52544	2.94336				10.1491		6.90239	3.52224	2.94158			10.1833		6.90149	3.52002	2.94025
	112	29.6484	10.1363		6.8982	3.51055	2.92953			6.90115	3.51736	2.93888																	10.232		6.90078	3.51565	2.93791				10.225		6.90067	3.51561	2.93789			10.2061		6.90099	3.51815	2.9392
	113	29.8516	10.2494		6.89967	3.50824	2.93462			6.89936	3.51046	2.93504																	10.3434		6.8987	3.50761	2.93345				10.2943		6.89929	3.51034	2.93496			10.3198		6.8988	3.50999	2.93464
	114	30.0547	10.3303		6.89896	3.50406	2.92507			6.89831	3.50643	2.9328																	10.4005		6.8978	3.50414	2.93151				10.3571		6.8982	3.50616	2.93263			10.3961		6.89759	3.50548	2.93212
	115	30.2578	10.3823		6.89859	3.50163	2.92419			6.89772	3.50417	2.93155																	10.4161		6.89757	3.50326	2.93102				10.4786		6.89645	3.49944	2.92889			10.4834		6.89641	3.50111	2.92967
	116	30.4609	10.4457		6.89756	3.49791	2.92243			6.89709	3.50174	2.93019																	10.5106		6.89634	3.49849	2.92837				10.4814		6.89642	3.4993	2.92882			10.5127		6.89606	3.49981	2.92895
	117	30.6641	10.5224		6.89898	3.49614	2.92185			6.89642	3.4992	2.92878																	10.6114		6.89526	3.49434	2.92607				10.6196		6.89491	3.4935	2.92559			10.5298		6.89587	3.49909	2.92855
	118	30.8672	10.5783		6.89865	3.49452	2.92012			6.89601	3.4976	2.92789																	10.6415		6.89499	3.49327	2.92547				10.6175		6.89493	3.49358	2.92563			10.5815		6.89533	3.49707	2.92741
	119	31.0703	10.6457		6.89789	3.49225	2.92818			6.89557	3.49592	2.92695																	10.7296		6.89427	3.49049	2.92393				10.6193		6.89491	3.49351	2.9256			10.7565		6.89388	3.49167	2.9244
